# Supplementary material
Source: publisher figshare collection journal article supplement (https://acs.figshare.com/ndownloader/files/5155192)
Supplement: Supplementary file 1 [file 5155192]

## **Supporting Materials**

### **Regioselectivity Control in a Ruthenium-catalyzed Cycloisomerization of Diyne-ols.**

Barry M. Trost<sup>\*</sup>, Michael T. Rudd, Moisés Gulías Costa, Philip I. Lee, and  
Andrew E. Pomerantz  
Department of Chemistry  
Stanford University  
Stanford, CA 94305-5080

## Supporting Materials

General experimental: All reactions were performed under an argon atmosphere unless otherwise noted. Dry acetone was distilled over drierite. Dry tetrahydrofuran (THF) was distilled over sodium benzophenone ketyl or purified on an alumina column purification system. All other solvents were purified on an alumina column purification system. Catalysts **3.1**<sup>1</sup> was prepared according to literature. Flash chromatography was performed with EM Science silica gel. Proton and broad band decoupled <sup>13</sup>C nuclear magnetic resonance data were acquired on Varian GEM300, Inova Unity 400, or Inova Unity 500 spectrometer as indicated. Chemical shifts are reported in ppm relative to TMS, CDCl<sub>3</sub>, or C<sub>6</sub>D<sub>6</sub>. Infrared (IR) data were recorded on sodium chloride plates on a Perkin Elmer Paragon 500 FT-IR spectrometer. The water used in all reactions was deionized water. All other chemicals were obtained from Aldrich, Acros, or GFS Chemical Companies and distilled prior to use.

### Cyclization Procedure A:

To a solution of diyne-ol (0.2 mmol) in distilled acetone (2 mL) was added water (1.5 mmol, 27  $\mu$ L) and [CpRu(CH<sub>3</sub>CN)<sub>3</sub>]PF<sub>6</sub> (**1**) (0.02 mmol, 8.5 mg). The yellow/orange solution was then sealed and heated in a 60 °C oil bath until consumption of starting material was complete as judged by TLC (generally 1-8 hr). The crude reaction mixture was then cooled to room temperature, diluted with petroleum ether (10 mL) and filtered through a plug of celite using ether as the eluent to remove most of the ruthenium components. The solvent was removed in vacuo to yield the crude product, which was purified using silica gel chromatography.

### Cyclization Procedure A':

To a solution of diyne-ol (0.2 mmol) in distilled acetone (2 mL) was added water (1.5 mmol, 27  $\mu$ L) and [CpRu(CH<sub>3</sub>CN)<sub>3</sub>]PF<sub>6</sub> (**1**) (0.02 mmol, 8.5 mg). The yellow/orange solution was then sealed and heated in a 50 °C oil bath until consumption of starting material was complete as judged by TLC (2hr). The crude reaction mixture was then cooled to room temperature, diluted with petroleum ether (10 mL) and filtered through a plug of celite using ether as the eluent to remove most of the ruthenium components. The solvent was removed in vacuo to yield the crude product, which was purified using silica gel chromatography.

### Cyclization Procedure B:

To a solution of diyne-ol (0.2 mmol) in distilled acetone (1.2 mL) was added water (0.8 mL) and [CpRu(CH<sub>3</sub>CN)<sub>3</sub>]PF<sub>6</sub> (**1**) (0.02 mmol, 8.5 mg). The yellow/orange solution was then sealed and heated in a 60 °C oil bath until consumption of starting material was complete as judged by TLC (generally 1-8 hr). The crude reaction mixture was then cooled to room temperature, diluted with petroleum ether (10 mL) and filtered through a plug of celite using ether as the eluent to remove most of the ruthenium components. The solvent was removed in vacuo to yield the crude product, which was purified using silica gel chromatography.

### Cyclization Procedure B':

## Supporting Materials

To a solution of diyne-ol (0.2 mmol) in distilled acetone (1.2 mL) was added water (0.8 mL) and [CpRu(CH<sub>3</sub>CN)<sub>3</sub>]PF<sub>6</sub> (**1**) (0.03 mmol, 13 mg). The yellow/orange solution was then sealed and heated in a 60 °C oil bath until consumption of starting material was complete as judged by TLC (generally 1-8 hr). The crude reaction mixture was then cooled to room temperature, diluted with petroleum ether (10 mL) and filtered through a plug of celite using ether as the eluent to remove most of the ruthenium components. The solvent was removed in vacuo to yield the crude product, which was purified using silica gel chromatography.

### Cyclization Procedure B'':

To a solution of diyne-ol (0.2 mmol) in distilled acetone (2 mL) was added Water (1.5 mmol, 27  $\mu$ L) and [CpRu(CH<sub>3</sub>CN)<sub>3</sub>]PF<sub>6</sub> (**1**) (0.02 mmol, 8.5 mg). The yellow/orange solution was then stirred at room temperature until consumption of starting material was complete as judged by TLC (15 min). The crude reaction mixture was diluted with petroleum ether (10 mL) and filtered through a plug of celite using ether as the eluent to remove most of the ruthenium components. The solvent was removed in vacuo to yield the crude product, which was purified using silica gel chromatography.

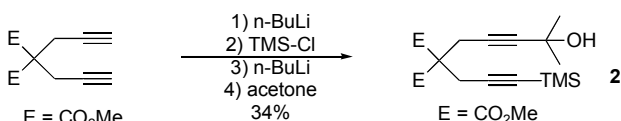

To a solution of dimethyl(bis)propargyl malonate (0.5 g, 2.4 mmol) in THF (20 mL) cooled to -78 °C was added n-BuLi (1.5 mL of 1.6 M solution in hexanes, 2.4 mmol). After stirring for 1 hr, TMS-Cl (0.31 mL, 2.4 mmol) was added and stirred for 2 hr. A second aliquot of n-BuLi (1.5 mL of 1.6 M solution in hexanes, 2.4 mmol) was added and stirred 1 hr. Freshly distilled acetone (0.36 mL, 4.8 mmol) was then added and the reaction was stirred 2 hr more. Saturated ammonium chloride was then added to the reaction at -78 °C and the mixture was warmed to room temperature, extracted with ether, dried over MgSO<sub>4</sub>, and the solvent removed in vacuo. The crude product was then purified using silica gel chromatography (40% ether/pet. ether) to yield 275 mg of **2** (34%).

Rf (40% Et<sub>2</sub>O/PE): 0.3. **IR** (neat): 3495, 2980, 2957, 2931, 2361, 2180, 1745, 1437, 1364, 1324, 1294, 1251, 1211, 1029, 957, 846, 761, 699 cm<sup>-1</sup>. **<sup>1</sup>H NMR** (300 MHz, CDCl<sub>3</sub>): 3.72 (s, 6H), 2.92 (s, 2H), 2.91 (s, 2H), 2.27 (bs, 1H), 1.43 (s, 6H), 0.1 (s, 9H). **<sup>13</sup>C NMR** (75 MHz, CDCl<sub>3</sub>): 169.3, 100.8, 88.6, 88.5, 76.5, 65.0, 57.2, 53.0, 31.5, 24.1, 22.9, -0.04. **Anal** Cal'c for C<sub>17</sub>H<sub>26</sub>O<sub>5</sub>Si: C, 60.32; H, 7.74. Found: C, 60.50; H, 7.90.

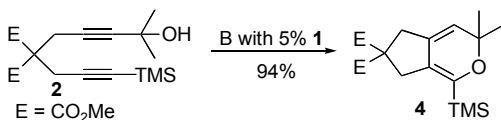

Procedure: B with 5% **1** for 20 hr.

Rf (50% Et<sub>2</sub>O/PE): 0.5. **IR** (neat): 2956, 1739, 1434, 1378, 1355, 1249, 1021, 1161, 1076, 901, 840, 754, 696 cm<sup>-1</sup>. **<sup>1</sup>H NMR** (400 MHz, C<sub>6</sub>D<sub>6</sub>): 4.81 (m, 1H), 3.28 (s, 6H),

## Supporting Materials

3.27 (s, 2H), 3.10, (d,  $J = 2$  Hz, 2H), 1.27 (s, 6H), 0.22 (s, 9H).  **$^{13}\text{C}$  NMR** (100 MHz,  $\text{C}_6\text{D}_6$ ): 171.5, 151.8, 133.9, 123.5, 116.7, 73.9, 60.3, 52.3, 37.9, 36.6, 27.5, -1.8. **Anal** Cal'c for  $\text{C}_{17}\text{H}_{26}\text{O}_5\text{Si}$ : C, 60.32; H, 7.74. Found: C, 60.32; H, 7.87.

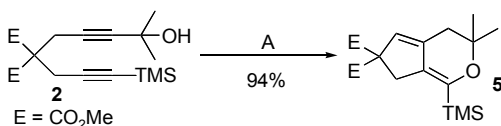

Procedure: A for 2hr.

Rf (50%  $\text{Et}_2\text{O}/\text{PE}$ ): 0.5. **IR** (neat): 2955, 2895, 2840, 1737, 1608, 1434, 1382, 1367, 1321, 1249, 1195, 1171, 1147, 1074, 931, 867, 840, 754  $\text{cm}^{-1}$ .  **$^1\text{H}$  NMR** (300 MHz,  $\text{C}_6\text{D}_6$ ): 5.75 (s, 1H), 3.57 (s, 2H), 3.33 (s, 6H), 2.13 (s, 2H), 1.08 (s, 6H), 0.17 (s, 9H).  **$^{13}\text{C}$  NMR** (75 MHz,  $\text{C}_6\text{D}_6$ ): 171.6, 150.9, 140.5, 127.7, 120.6, 72.9, 65.1, 52.7, 36.5, 34.4, 26.4, -2.0. **HRMS** (EI,  $[\text{M}]^+$ ) Cal'c for  $\text{C}_{17}\text{H}_{26}\text{O}_5\text{Si}$ : 338.1550. Found: 338.1547 (17.4), 279.1402 (92.1), 175.07 (22.1).

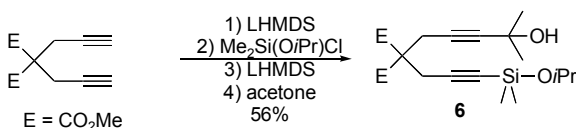

To a solution of dimethyl(bis)propargyl malonate (0.5 g, 2.4 mmol) in THF (20 mL) cooled to  $-78^\circ\text{C}$  was added LHMDS (2.4 mL of 1.0 M solution in THF, 2.4 mmol). After stirring for 30 minutes,  $\text{Me}_2\text{Si}(\text{OiPr})\text{Cl}$  (0.33 g, 2.4 mmol) was added and stirred for 1 hr. A second aliquot of LHMDS (2.8 mL of 1.0 M solution in THF, 2.8 mmol) was added and stirred 15 minutes. Freshly distilled acetone (0.36 mL, 4.8 mmol) was then added and the reaction was stirred 1 hr more. Saturated ammonium chloride was then added to the reaction at  $-78^\circ\text{C}$  and the mixture was warmed to room temperature, extracted with ether, dried over  $\text{MgSO}_4$ , and the solvent removed in vacuo. The crude product was then purified using silica gel chromatography (40% ether/pet. ether) to yield 490 mg of **6** (56%).

Rf (40%  $\text{Et}_2\text{O}/\text{PE}$ ): 0.35. **IR** (neat): 3490, 2971, 2930, 2179, 1745, 1437, 1368, 1324, 1293, 1257, 1211, 1122, 1081, 1029, 952, 885, 832, 793, 667  $\text{cm}^{-1}$ .  **$^1\text{H}$  NMR** (400 MHz,  $\text{C}_6\text{D}_6$ ): 4.15 (sep,  $J = 6$  Hz, 1H), 3.37 (s, 6H), 3.30 (s, 2H), 3.28 (s, 2H), 2.57 (bs, 1H), 1.39 (s, 6H), 1.19 (d,  $J = 6$  Hz, 6H), 0.23 (s, 6H).  **$^{13}\text{C}$  NMR** (100 MHz,  $\text{C}_6\text{D}_6$ ): 169.3, 101.2, 89.9, 87.6, 76.1, 66.2, 64.7, 57.4, 52.7, 31.6, 25.7, 24.5, 23.4, 0.9. **HRMS** (EI,  $[\text{M}-\text{OH}]^+$ ) Cal'c for  $\text{C}_{19}\text{H}_{29}\text{O}_5\text{Si}$ : 365.1784. Found: 365.1799 (0.6), 339.1254 (35.1), 307.0992 (49.1).

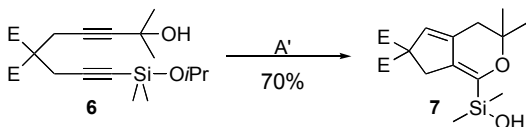

Procedure: A' for 2hr (some amount of dimer also formed).

Rf (20%  $\text{Et}_2\text{O}/\text{PE}$ ): 0.40. **IR** (neat): 3530, 2956, 2853, 1736, 1611, 1435, 1382, 1367, 1321, 1252, 1196, 1171, 1148, 1079, 932, 865, 823, 781  $\text{cm}^{-1}$ .  **$^1\text{H}$  NMR** (300 MHz,  $\text{CDCl}_3$ ): 5.52 (bs, 1H), 3.74 (s, 6H), 3.21 (s, 2H), 2.39 (s, 2H), 1.90 (bs, 1H), 1.18 (s, 6H),

0.28 (s, 6H). **<sup>13</sup>C NMR** (75MHz, CDCl<sub>3</sub>): 171.5, 149.1, 140.2, 128.5, 121.8, 100.3, 73.3, 65.2, 52.8, 36.5, 26.5, -0.6. **HRMS** (EI, [M]<sup>+</sup>) Cal'c for C<sub>16</sub>H<sub>24</sub>O<sub>6</sub>Si: 340.1342. Found: 340.1337 (23.1), 281.1225 (100).

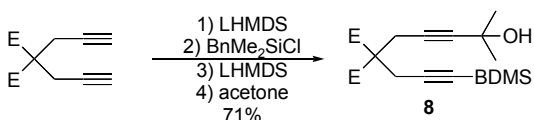

To a solution of dimethyl(bis)propargyl malonate (1.0 g, 4.8 mmol) in THF (35 mL) cooled to -78 °C was added LHMDS (4.8 mL of 1.0 M solution in THF, 4.8 mmol). After stirring for 30 minutes, BnMe<sub>2</sub>SiCl (0.87 mL, 4.8 mmol) was added and stirred for 1 hr. A second aliquot of LHMDS (6.2 mL of 1.0 M solution in THF, 6.2 mmol) was added and stirred 30 minutes. Freshly distilled acetone (0.36 mL, 4.8 mmol) was then added and the reaction was stirred 1 hr more. Saturated ammonium chloride was then added to the reaction at -78 °C and the mixture was warmed to room temperature, extracted with ether, dried over MgSO<sub>4</sub>, and the solvent removed in vacuo. The crude product was then purified using silica gel chromatography (40% ether/pet. ether) to yield 1.41 g of **8** (71%).

R<sub>f</sub> (40% Et<sub>2</sub>O/PE): 0.2. **IR** (neat): 3495, 3025, 2958, 2898, 2180, 1744, 1600, 1494, 1452, 1436, 1364, 1324, 1294, 1249, 1209, 1028, 952, 839, 764, 700 cm<sup>-1</sup>. **<sup>1</sup>H NMR** (300 MHz, CDCl<sub>3</sub>): 7.20 (m, 2H), 7.05 (m, 3H), 3.71 (s, 6H), 2.97 (s, 2H), 2.92 (s, 2H), 2.37 (s, 1H), 2.15 (s, 2H), 1.46 (s, 6H). **<sup>13</sup>C NMR** (75MHz, CDCl<sub>3</sub>): 169.2, 138.8, 128.3, 128.2, 124.3, 102.1, 88.7, 86.9, 76.4, 64.9, 57.0, 52.9, 31.5, 26.1, 24.1, 22.8, -2.1. **HRMS** (EI, [M-CH<sub>3</sub>]<sup>+</sup>) Cal'c for C<sub>22</sub>H<sub>27</sub>O<sub>5</sub>Si: 399.1628. Found: 399.1635 (1.7), 323.1300 (12.3), 263.1099 (90.7). **LRMS** (CI, [M + H]<sup>+</sup>) Cal'c for C<sub>23</sub>H<sub>31</sub>O<sub>5</sub>Si: 415.2. Found: 415.3, 432.3 [M + NH<sub>3</sub>]<sup>+</sup>.

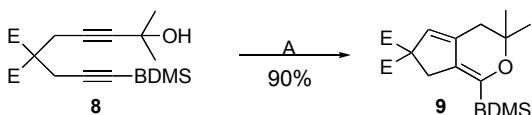

Procedure: A for 2 hr.

R<sub>f</sub> (40% Et<sub>2</sub>O/PE): 0.4. mp = 59-61 °C. **IR** (neat): 3067, 3021, 2954, 2899, 1737, 1600, 1494, 1434, 1367, 1321, 1250, 1148, 1075, 823, 649 cm<sup>-1</sup>. **<sup>1</sup>H NMR** (300 MHz, C<sub>6</sub>D<sub>6</sub>): 7.13 (m, 3H), 7.01 (m, 2H), 5.74 (s, 1H), 3.40 (s, 2H), 3.33 (s, 6H), 2.22 (s, 2H), 2.13 (s, 2H), 1.08 (s, 6H). **<sup>13</sup>C NMR** (75MHz, C<sub>6</sub>D<sub>6</sub>): 171.0, 149.4, 140.0, 139.4, 128.9, 128.4, 128.2, 124.1, 121.8, 72.8, 65.3, 52.0, 36.3, 34.7, 26.2, 24.3, -4.2. **HRMS** (EI, [M]<sup>+</sup>) Cal'c for C<sub>23</sub>H<sub>30</sub>O<sub>5</sub>Si: 414.1863. Found: 414.1863 (33.3), 355.1717 (100).

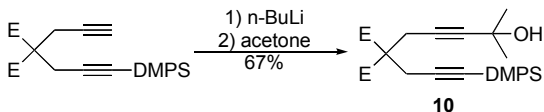

To a solution of mono-dimethylphenylsilyl-protected dimethyl(bis)propargyl malonate (0.83 g, 2.43 mmol) in THF (25 mL) cooled to -78 °C was added n-BuLi (1.88 mL of 1.36 M solution in hexanes, 2.55 mmol). After stirring for 1 hr, acetone (0.2 mL, 2.67 mmol) was added and stirred for 2 hr. Saturated ammonium chloride was then added to

## Supporting Materials

the reaction at  $-78\text{ }^{\circ}\text{C}$  and the mixture was warmed to room temperature, extracted with ether, dried over  $\text{MgSO}_4$ , and the solvent removed in vacuo. The crude product was then purified using silica gel chromatography (50% ether/pet. ether) to yield 650 mg of **10** (67%).

Rf (30%  $\text{Et}_2\text{O}/\text{PE}$ ): 0.15. **IR** (neat): 3500, 3070, 2958, 2844, 2246, 2180, 1731, 1435, 1265, 1324, 1294, 1208, 1116, 1026, 952, 818, 782, 733, 703, 665  $\text{cm}^{-1}$ .  **$^1\text{H}$  NMR** (400 MHz,  $\text{CDCl}_3$ ): 7.57 (m, 2H), 7.36 (m, 3H), 3.72 (s, 6H), 3.02 (s, 2H), 2.98 (s, 2H), 2.40 (bs 1H), 1.46 (s, 6H), 0.37 (s, 6H).  **$^{13}\text{C}$  NMR** (100MHz,  $\text{CDCl}_3$ ): 169.4, 137.1, 133.8, 129.6, 128.1, 102.9, 88.9, 86.7, 76.6, 65.2, 57.3, 53.3, 31.7, 24.4, 23.2, -0.6. **HRMS** (EI,  $[\text{M}]^+$ ) Cal'c for  $\text{C}_{22}\text{H}_{28}\text{O}_5\text{Si}$ : 400.1706. Found: 400.1709 (0.1), 285.1478 (3.4), 135.0672 (100).

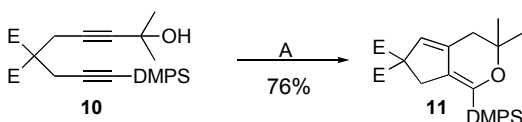

Procedure: A for 2.5 hr

Rf (30%  $\text{Et}_2\text{O}/\text{PE}$ ): 0.4. **IR** (neat): 3070, 2973, 2954, 2901, 1737, 1607, 1430, 1382, 1367, 1321, 1250, 1195, 1171, 1148, 1111, 1076, 865, 812, 780, 701  $\text{cm}^{-1}$ .  **$^1\text{H}$  NMR** (400 MHz,  $\text{C}_6\text{D}_6$ ): 7.58 (m, 2H), 7.15 (m, 3H), 5.70 (bs, 1H), 3.34 (s, 2H), 3.26 (s, 6H), 2.05 (d,  $J = 1.2\text{ Hz}$ , 2H), 1.02 (s, 6H), 0.39 (s, 6H).  **$^{13}\text{C}$  NMR** (100 MHz,  $\text{C}_6\text{D}_6$ ): 171.2, 149.4, 140.4, 137.3, 134.3, 129.7, 129.4, 128.0, 122.3, 73.2, 65.5, 52.2, 36.5, 35.1, 26.4, -3.2. **HRMS** (EI,  $[\text{M}]^+$ ) Cal'c for  $\text{C}_{22}\text{H}_{28}\text{O}_5\text{Si}$ : 400.1706. Found: 400.1713 (29.7), 342.1613 (23.1), 341.1568 (85.7), 135.0637 (100).

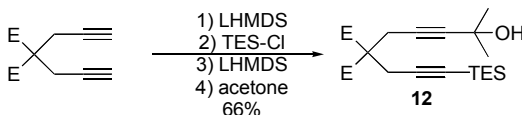

To a solution of dimethyl(bis)propargyl malonate (0.5 g, 2.4 mmol) in THF (20 mL) cooled to  $-78\text{ }^{\circ}\text{C}$  was added LHMDS (2.4 mL of 1.0 M solution in THF, 2.4 mmol). After stirring for 30 minutes, TES-Cl (0.36 g, 2.4 mmol) was added and stirred for 1 hr. A second aliquot of LHMDS (2.8 mL of 1.0 M solution in THF, 2.8 mmol) was added and stirred 15 minutes. Freshly distilled acetone (0.36 mL, 4.8 mmol) was then added and the reaction was stirred 1 hr more. Saturated ammonium chloride was then added to the reaction at  $-78\text{ }^{\circ}\text{C}$  and the mixture was warmed to room temperature, extracted with ether, dried over  $\text{MgSO}_4$ , and the solvent removed in vacuo. The crude product was then purified using silica gel chromatography (40% ether/pet. ether) to yield 627 mg of **12** (66%).

Rf (40%  $\text{Et}_2\text{O}/\text{PE}$ ): 0.4. **IR** (neat): 3494, 2956, 2178, 1745, 1437, 1324, 1294, 1211, 1028, 952, 850, 727  $\text{cm}^{-1}$ .  **$^1\text{H}$  NMR** (500 MHz,  $\text{CDCl}_3$ ): 3.72 (s, 6H), 2.96 (s, 2H), 2.94 (s, 2H), 1.44 (s, 6H), 0.94 (t,  $J = 8\text{ Hz}$ , 9H), 0.55 (q,  $J = 8\text{ Hz}$ , 6H).  **$^{13}\text{C}$  NMR** (125 MHz,  $\text{CDCl}_3$ ): 169.3, 101.8, 88.6, 85.7, 76.7, 65.1, 57.1, 53.0, 31.6, 24.2, 22.9, 7.5, 4.4. **Anal** Cal'c for  $\text{C}_{22}\text{H}_{36}\text{O}_5\text{Si}$ : C, 64.70; H, 8.88. Found: C, 63.93; H, 8.31.

## Supporting Materials

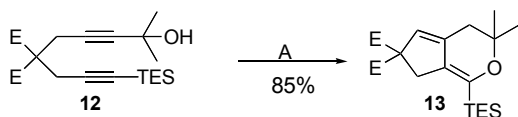

Procedure: A for 2 hr.

R<sub>f</sub> (40% Et<sub>2</sub>O/PE): 0.55. **IR** (neat): 2954, 2875, 1738, 1434, 1366, 1251, 1073, 1004, 721 cm<sup>-1</sup>. **<sup>1</sup>H NMR** (500 MHz, CDCl<sub>3</sub>): 5.42 (s, 1H), 3.71 (s, 6H), 3.12 (s, 2H), 2.34 (s, 2H), 1.14 (s, 6H), 0.93 (t, J = 8Hz, 9H), 0.66 (q, J = 8Hz, 6H). **<sup>13</sup>C NMR** (125 MHz, CDCl<sub>3</sub>): 171.9, 150.1, 140.9, 128.6, 73.2, 65.2, 53.0, 36.8, 34.9, 26.8, 7.6, 2.9. **HRMS** Cal'c for C<sub>20</sub>H<sub>32</sub>O<sub>5</sub>Si: 380.2019. Found: 380.2017 (72.9), 321.0914 (97.1), 87.0631 (100).

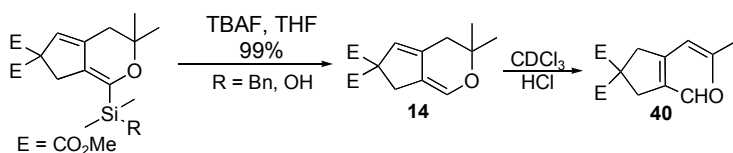

To a solution of **7** or **9** (0.15 mmol) in THF (1.6 mL) cooled to 0 °C was added TBAF (0.3 mL of a 1M solution in THF, 0.3 mmol). The solution was then warmed to room temperature, and stirred until starting material was consumed (30 minutes). The crude reaction was filtered through a plug of silica with ether, and the solvent was removed in vacuo. The crude product was then purified on silica (30% ether/pet. ether) to yield **14** (39 mg, 99%).

R<sub>f</sub> (20% Et<sub>2</sub>O/PE):. **IR** (neat): 3072, 2968, 2845, 1732, 1658, 1620, 1434, 1369, 1332, 1248, 1168, 1124, 1091, 1057, 965, 811, 702 cm<sup>-1</sup>. **<sup>1</sup>H NMR** (400 MHz, C<sub>6</sub>D<sub>6</sub>): 6.06 (bs, 1H), 5.65 (bs, 1H), 3.29 (s, 3H), 3.28 (s, 3H), 3.25 (d, J = 2 Hz, 2H), 2.02 (s, 2H), 1.02 (s, 6H). **<sup>13</sup>C NMR** (100 MHz, C<sub>6</sub>D<sub>6</sub>): 171.2, 140.2, 135.9, 121.2, 118.7, 74.4, 65.7, 52.2, 36.3, 33.2, 26.2. Compound **14** is highly unstable, and satisfactory elemental analysis or HRMS with EI ionization were unable to be obtained. Additional characterization was obtained upon conversion to the known compound 3-formyl-4-(2-methyl-propenyl)-cyclopent-3-ene-1,1-dicarboxylic acid dimethyl ester (**40**).<sup>2</sup>

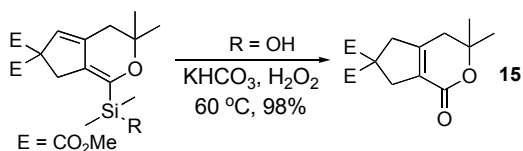

To a solution of **7** (20 mg, 0.058 mmol) in 50/50 THF/MeOH (1 mL total) was added KHCO<sub>3</sub> (12 mg, 0.117 mmol) and H<sub>2</sub>O<sub>2</sub> (20 μL of a 30% solution in water, 0.176 mmol). The reaction was then heated to 65 °C for 1 hr, cooled to room temperature, extracted with ether, dried over MgSO<sub>4</sub>, and the solvent was removed in vacuo. The crude product was purified on silica (80% ether/pet.ether) to yield **15** (16 mg, 98%).

R<sub>f</sub> (80% Et<sub>2</sub>O/PE): 0.2. **IR** (neat): 2976, 2932, 2849, 1732, 1709, 1433, 1386, 1255, 1193, 1152, 1112, 1070, 1021 cm<sup>-1</sup>. **<sup>1</sup>H NMR** (400 MHz, C<sub>6</sub>D<sub>6</sub>): 3.50 (app. p, J = 2Hz, 2H), 3.22 (s, 6H), 2.93 (app. t, J = 1.6 Hz, 2H), 1.44 (s, 2H), 0.96 (s, 6H). **<sup>13</sup>C NMR** (100 MHz, C<sub>6</sub>D<sub>6</sub>): 171.5, 161.6, 152.4, 126.1, 79.8, 57.7, 52.4, 43.9, 38.9, 35.9, 27.6. **HRMS** (EI, [M]<sup>+</sup>) Cal'c for C<sub>14</sub>H<sub>18</sub>O<sub>6</sub>: 282.1103. Found: 282.1105 (11.9), 223.0944 (61.0), 205.0872 (76.0), 164.0485 (100).

## Supporting Materials

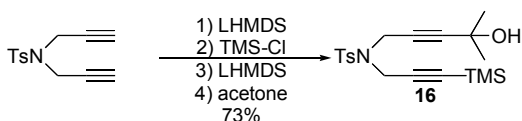

To a solution of bispropargyltosylamine (0.505 g, 2.04 mmol) in THF (8 mL) cooled to -78 °C was added LHMDS (2.9 mL of 0.7 M solution in THF, 2.04 mmol). After stirring for 20 minutes, TMS-Cl (0.26 mL, 2.04 mmol) was added and stirred for 15 minutes. A second aliquot of LHMDS (4.37 mL of 0.7 M solution in THF, 3.06 mmol) was added and stirred 15 minutes. Freshly distilled acetone (0.3 mL, 4.08 mmol) was then added and the reaction was stirred 15 minutes more. Saturated ammonium chloride was then added to the reaction at -78 °C and the mixture was warmed to room temperature, extracted with ether, dried over MgSO<sub>4</sub>, and the solvent removed in vacuo. The crude product was then purified using silica gel chromatography (40% ether/pet. ether) to yield 560 mg of **16** (73%).

R<sub>f</sub> (50% Et<sub>2</sub>O/PE): 0.35. mp = 78-80 °C. **IR** (neat): 3524, 2980, 2179, 1654, 1598, 1495, 1437, 1401, 1352, 1250, 1163, 1095, 1002, 952, 903, 843, 756, 665 cm<sup>-1</sup>. **<sup>1</sup>H NMR** (400 MHz, CDCl<sub>3</sub>): 7.70 (d, J = 8.4 Hz, 2H), 7.28 (d, J = 8 Hz, 2H), 4.14 (s, 2H), 4.13 (s, 2H), 2.40 (s, 3H), 1.52 (bs, 1H), 1.35 (s, 6H), 0.04 (s, 9H). **<sup>13</sup>C NMR** (125 MHz, CDCl<sub>3</sub>): 143.9, 135.6, 129.7, 128.0, 97.6, 91.1, 90.4, 74.6, 65.0, 37.3, 36.4, 31.1, 21.6, -0.3. **Anal** Cal'c for C<sub>19</sub>H<sub>27</sub>NO<sub>3</sub>SSi: C, 60.44; H, 7.21; N, 3.71. Found: C, 60.64; H, 7.0; N, 3.57.

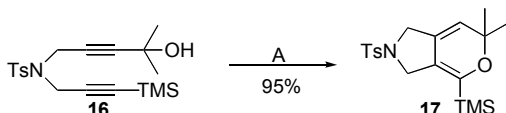

Procedure: A for 1 hr.

R<sub>f</sub> (20% Et<sub>2</sub>O/PE): 0.55. mp = 122-124 °C. **IR** (neat): 2964, 2850, 1673, 1597, 1345, 1246, 1162, 1079, 847, 813, 665 cm<sup>-1</sup>. **<sup>1</sup>H NMR** (400 MHz, C<sub>6</sub>D<sub>6</sub>): 7.75 (d, J = 8.4 Hz, 2H), 6.75 (d, J = 8 Hz, 2H), 4.49 (t, J = 2 Hz, 1H), 4.18 (s, 2H), 3.85 (d, J = 2 Hz, 2H), 1.87 (s, 3H), 1.11 (s, 6H), 0.03 (s, 9H). **<sup>13</sup>C NMR** (100 MHz, C<sub>6</sub>D<sub>6</sub>): 152.1, 143.1, 134.4, 130.9, 129.7, 128.1, 120.4, 115.3, 73.9, 50.6, 49.6, 27.5, 21.0, -2.6. **Anal** Cal'c for C<sub>19</sub>H<sub>27</sub>NO<sub>3</sub>SSi: C, 60.44; H, 7.21; N, 3.71. Found: C, 60.51; H, 7.19; N, 3.30.

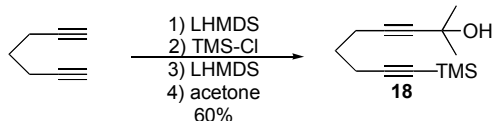

To a solution of 1,6-heptadiyne (0.530 g, 5.75 mmol) in THF (40 mL) cooled to -78 °C was added LHMDS (11.5 mL of 0.5 M solution in THF, 5.75 mmol). After stirring for 30 minutes, TMS-Cl (0.73 mL, 5.75 mmol) was added and stirred for 30 minutes. A second aliquot of LHMDS (13.8 mL of 0.5 M solution in THF, 6.90 mmol) was added and stirred 30 minutes. Freshly distilled acetone (0.63 mL, 8.63 mmol) was then added and the reaction was stirred 30 minutes more. Saturated ammonium chloride was then added to the reaction at -78 °C and the mixture was warmed to room temperature, extracted with ether, dried over MgSO<sub>4</sub>, and the solvent removed in vacuo. The crude product was then purified using silica gel chromatography (30% ether/pet. ether) to yield



720 mg of **16** (60%). The product still contained some minor impurities which could not be totally eliminated upon distillation, and was used as is after distillation.

Rf (25% Et<sub>2</sub>O/PE): 0.3. **IR** (neat): 3374, 2958, 2237, 2175, 1454, 1362, 1249, 1165, 1044, 949, 843, 760, 698, 638 cm<sup>-1</sup>. **<sup>1</sup>H NMR** (300 MHz, CDCl<sub>3</sub>): 2.27 (q, J = 7.8 Hz, 4H), 2.1 (bs, 1H), 1.66 (m, 2H), 1.45 (s, 6H), 0.11 (s, 9H). **<sup>13</sup>C NMR** (75 MHz, CDCl<sub>3</sub>): 106.4, 85.8, 85.1, 81.5, 65.3, 31.8, 28.8, 19.1, 17.8, 0.2. **Anal** Cal'c for C<sub>13</sub>H<sub>22</sub>OSi: C, 70.21; H, 9.97. Found: C, 70.15; H, 10.13.

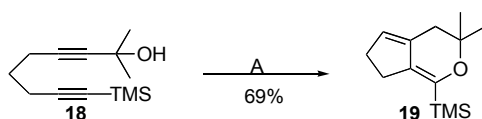

Procedure: A for 15 hr.

Rf (20% Et<sub>2</sub>O/PE): 0.9. **IR** (neat): 2926, 2852, 1656, 1446, 1366, 1246, 1066, 836, cm<sup>-1</sup>. **<sup>1</sup>H NMR** (400 MHz, C<sub>6</sub>D<sub>6</sub>): 5.33 (bs, 1H), 2.52 (m, 2H), 2.38 (m, 2H), 2.20 (q, J = 1.6 Hz, 2H), 1.17 (s, 6H), 0.26 (s, 9H). **<sup>13</sup>C NMR** (100 MHz, C<sub>6</sub>D<sub>6</sub>): 147.2, 137.1, 132.9, 125.4, 72.2, 37.3, 31.7, 26.7, 25.9, -1.5. **HRMS** (EI, [M]<sup>+</sup>) Cal'c for C<sub>13</sub>H<sub>22</sub>OSi: 222.1440. Found: 222.1433 (50.3), 207.1194 (43.0), 73.0474 (100).

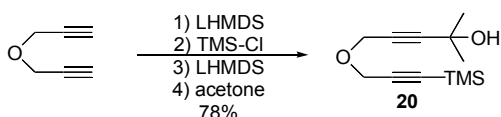

To a solution of bispropargylether (0.258 g, 2.72 mmol) in THF (8 mL) cooled to -78 °C was added LHMDS (3.9 mL of 0.7 M solution in THF, 2.72 mmol). After stirring for 20 minutes, TMS-Cl (0.35 mL, 2.72 mmol) was added and stirred for 15 minutes. A second aliquot of LHMDS (5.8 mL of 0.7 M solution in THF, 4.08 mmol) was added and stirred 15 minutes. Freshly distilled acetone (0.40 mL, 5.4 mmol) was then added and the reaction was stirred 30 minutes more. Saturated ammonium chloride was then added to the reaction at -78 °C and the mixture was warmed to room temperature, extracted with ether, dried over MgSO<sub>4</sub>, and the solvent removed in vacuo. The crude product was then purified using silica gel chromatography (30% ether/pet. ether) to yield 475 mg of **20** (78%).

Rf (30% Et<sub>2</sub>O/PE): 0.4. **IR** (neat): 3418, 2961, 2855, 2174, 1443, 1363, 1251, 1168, 1088, 1001, 950, 845, 761 cm<sup>-1</sup>. **<sup>1</sup>H NMR** (500 MHz, CDCl<sub>3</sub>): 4.22 (s, 2H), 4.19 (s, 2H), 2.1 (bs, 1H), 1.49 (s, 6H), 0.15 (s, 9H). **<sup>13</sup>C NMR** (125 MHz, CDCl<sub>3</sub>): 100.6, 92.1, 91.6, 77.2, 65.2, 57.4, 56.9, 31.4, -0.1. **HRMS** (EI, [M-H]<sup>+</sup>) Cal'c for C<sub>12</sub>H<sub>19</sub>O<sub>2</sub>Si: 223.1154. Found: 223.1158 (12.0), 209.0996 (33.0), 179.0890 (85.0).

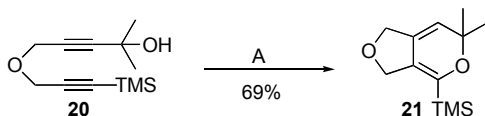

Procedure: A for 2hr.

Rf (30% Et<sub>2</sub>O/PE): 0.6. **IR** (neat): 2962, 2851, 1460, 1358, 1248, 1164, 1084, 1047, 905, 840, cm<sup>-1</sup>. **<sup>1</sup>H NMR** (400 MHz, C<sub>6</sub>D<sub>6</sub>): 4.62 (bs, 1H), 4.56 (s, 2H), 4.29 (d, J = 2Hz,

2H), 1.27 (s, 6H), 0.09 (s, 9H). **<sup>13</sup>C NMR** (100 MHz, C<sub>6</sub>D<sub>6</sub>): 149.8, 134.2, 123.9, 113.0, 73.5, 69.6, 68.9, 27.7, -2.5. **HRMS** (EI, [M]<sup>+</sup>) Cal'c for C<sub>12</sub>H<sub>20</sub>O<sub>2</sub>Si: 224.1233. Found: 224.1227 (9.8), 149.0238 (29.7), 71.086 (100).

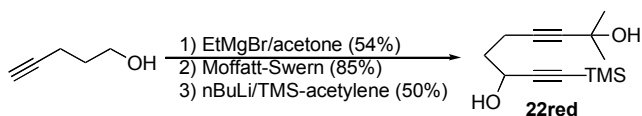

To a solution of 4-pentyn-1-ol (2 mL, 21.4 mmol) in THF (125 mL) cooled to -78 °C was added EtMgBr (42.8 mL of a 1 M solution in THF, 42.8 mmol). The mixture was allowed to warm to room temperature and stir for 3 hours. After cooling back to -78 °C, freshly distilled acetone (4.72 mL, 64.2 mmol) was added slowly. The reaction was warmed to room temperature and stirred an additional 2.5 hr, quenched with saturated ammonium chloride, extracted with ether, dried over MgSO<sub>4</sub>, and the solvent was removed in vacuo. The crude product was purified on silica (90% ether/pet. ether) to yield 1.63 g (54%) of the expected tertiary propargyl alcohol.

To a solution of DMSO (1.48 mL, 20 mmol) in DCM (66 mmol) at -78 °C was added oxalyl chloride (0.9 mL, 10 mmol) dropwise and stirred 15 minutes. The tertiary propargyl alcohol product of the first reaction (0.99 g, 6.96 mmol) was then in DCM (15 mL) to the activated DMSO slowly. This solution was then stirred 15 minutes, Et<sub>3</sub>N (4.9 mL, 35 mmol) was added, and stirred a further 30 min. The reaction was quenched with water, extracted with ether, dried over MgSO<sub>4</sub>, and the solvent was removed in vacuo to yield crude aldehyde (830 mg, 85%) which was used for the following reaction.

To a solution of TMS-acetylene (4 mL, 28 mmol) in THF (50 mL) cooled to -78 °C was added n-BuLi (11 mL of a 2.5 M solution in hexanes, 27.5 mmol), and the mixture was stirred for 1 hr. The aldehyde product from the previous reaction was then added in THF (12 mL), warmed to room temperature and stirred an additional 30 minutes, quenched with saturated ammonium chloride, extracted with ether, dried over MgSO<sub>4</sub>, and the solvent was removed in vacuo. The crude product was purified on silica (50% ether/pet. ether) to yield 641 mg (50%) of **22red**.

R<sub>f</sub> (100% Et<sub>2</sub>O): 0.85. **IR** (neat): 3555, 2960, 2934, 2238, 2173, 1423, 1408, 1363, 1333, 1250, 1164, 1069, 1006, 945, 904, 843, 760, 699 cm<sup>-1</sup>. **<sup>1</sup>H NMR** (400 MHz, CDCl<sub>3</sub>): 4.46 (m, 1H), 2.42-2.24 (m, 2H), 2.20 (bs, 1H), 1.86 (q, J = 7.2 Hz, 2H), 1.46 (s, 6H), 0.14 (s, 9H). **<sup>13</sup>C NMR** (100 MHz, CDCl<sub>3</sub>): 105.9, 89.9, 85.9, 81.3, 65.4, 61.7, 36.4, 31.7, 14.7, -0.08. **Anal** Cal'c for C<sub>13</sub>H<sub>22</sub>O<sub>2</sub>Si: C, 65.50; H, 9.30. Found: C, 65.52; H, 9.50.

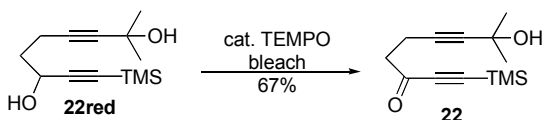

To a solution of **22red** (99 mg, 0.415 mmol) in DCM (2 mL) at 0 °C was added NaHCO<sub>3</sub> (1.0 mL of 5wt% in water), TEMPO (0.65 mg, 0.00415 mmol), KBr (5 mg, 0.04 mmol), and NaOCl (10% in water, 0.62 mmol). The mixture was stirred for 1 hr, extracted with DCM, dried over MgSO<sub>4</sub>, and the solvent was removed in vacuo. The crude product was purified on silica (50% ether/pet. ether) to yield 67 mg (67%) of **22**.

## Supporting Materials

R<sub>f</sub> (50% Et<sub>2</sub>O/PE): 0.35. **IR** (neat): 3416, 2980, 2933, 2151, 1679, 1363, 1253, 1166, 1114, 847, 762 cm<sup>-1</sup>. **<sup>1</sup>H NMR** (400 MHz, C<sub>6</sub>D<sub>6</sub>): 2.40 (m, 2H), 2.29 (m, 2H), 1.74 (bs, 1H), 1.39 (s, 6H), 0.03 (s, 9H). **<sup>13</sup>C NMR** (100 MHz, C<sub>6</sub>D<sub>6</sub>): 184.3, 102.5, 97.1, 86.8, 79.9, 64.8, 44.3, 31.7, 13.5, -1.0. **Anal** Cal'c for C<sub>13</sub>H<sub>20</sub>O<sub>2</sub>Si: C, 66.05; H, 8.53. Found: C, 65.88; H, 8.42.

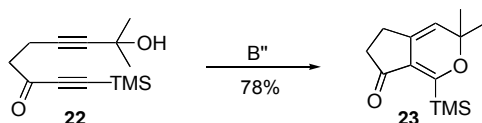

Procedure: B'' for 15 minutes.

R<sub>f</sub> (50% Et<sub>2</sub>O/PE): 0.6. **IR** (neat): 2972, 2926, 1702, 1654, 1553, 1460, 1412, 1380, 1361, 1287, 1267, 1246, 1175, 1092, 1019, 891, 843, 762, 701 cm<sup>-1</sup>. **<sup>1</sup>H NMR** (400 MHz, C<sub>6</sub>D<sub>6</sub>): 4.57 (bs, 1H), 2.075 (s, 2H), 2.073 (s, 2H), 1.21 (s, 6H), 0.44 (s, 9H). **<sup>13</sup>C NMR** (100 MHz, C<sub>6</sub>D<sub>6</sub>): 203.0, 173.5, 135.3, 124.1, 113.6, 78.6, 37.2, 28.4, 23.6, -2.6. **HRMS** (EI, [M]<sup>+</sup>) Cal'c for C<sub>13</sub>H<sub>20</sub>O<sub>2</sub>Si: 236.1233. Found: 236.1226 (52.3), 221.0998(70.8), 208.1278 (61.5), 73.0484 (100).

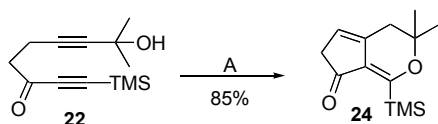

Procedure: A for 18 hr.

R<sub>f</sub> (50% Et<sub>2</sub>O/PE): 0.61. **IR** (neat): 2975, 2933, 2888, 1705, 1568, 1369, 1347, 1246, 1215, 1162, 1128, 1094, 1006, 978, 918, 842, 760, 717. **<sup>1</sup>H NMR** (400 MHz, C<sub>6</sub>D<sub>6</sub>): 5.15 (p, J = 2 Hz, 1H), 2.69 (q, J = 2.4 Hz, 2H), 2.04 (q, J = 1.6 Hz, 2H), 1.01 (s, 6H), 0.47 (s, 9H). **<sup>13</sup>C NMR** (100 MHz, C<sub>6</sub>D<sub>6</sub>): 202.4, 169.0, 136.6, 127.9, 116.9, 76.2, 43.1, 36.9, 26.5, -2.6. **HRMS** (EI, [M]<sup>+</sup>) Cal'c for C<sub>13</sub>H<sub>20</sub>O<sub>2</sub>Si: 236.1233. Found: 236.1230 (45.4), 222.1019 (24.4), 221.0992 (66.8), 208.1284 (54.5), 73.0485 (100).

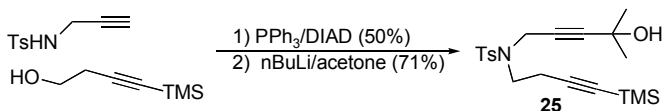

To a solution of tosyl-protected propargyl amine (2 g, 9.56 mmol), 4-trimethylsilanylbut-3-yn-1-ol (1.28 g, 8.93 mmol), and triphenylphosphine (2.46 g, 9.38 mmol) in THF (70 mL) cooled to 0 °C was added DIAD (1.83 mL, 9.29 mmol) dropwise. The mixture was warmed slowly to room temperature and stirred an additional 8 hr. Silica gel was then added to crude reaction mixture, and filtered through silica gel with ether as the eluent. The solvent was removed in vacuo, and the crude product was purified on silica (20% ether/pet. ether) to yield 4-methyl-N-prop-2-ynyl-N-(4-trimethylsilanylbut-3-ynyl)-benzenesulfonamide (1.5 g, 50%) as a white solid (mp = 89-92 °C).

To a solution of the product of the previous reaction (390 mg, 0.89 mmol) in THF (10 mL) at -78 °C was added n-BuLi (0.74 mL of a 1.56 M solution in hexanes, 1.157 mmol). Following 30 minutes stirring, freshly distilled acetone (0.098 mL, 1.34 mmol) was added dropwise, and stirring was continued for 30 minutes more. Saturated ammonium chloride was added, the reaction mixture was warmed to room temperature,

extracted with ether, and the solvent was removed in vacuo to yield the crude product which was purified on silica (50% ether/pet. ether) to give pure **25** (249 mg, 71%).

R<sub>f</sub> (50% Et<sub>2</sub>O/PE): 0.35. **IR** (neat): 3512, 2980, 2177, 1598, 1493, 1451, 1348, 1250, 1161, 1097, 843 cm<sup>-1</sup>. **<sup>1</sup>H NMR** (500 MHz, CDCl<sub>3</sub>): 7.75 (d, J = 8.5 Hz, 2H), 7.33 (d, J = 8 Hz, 2H), 4.2 (s, 2H), 3.36 (t, J = 7 Hz, 2H), 2.56 (t, J = 7 Hz, 2H), 2.43 (s, 3H), 1.30 (s, 6H), 0.16 (s, 9H). **<sup>13</sup>C NMR** (125 MHz, CDCl<sub>3</sub>): 143.6, 136.3, 129.6, 127.7, 103.3, 90.3, 86.9, 74.9, 64.8, 45.5, 37.6, 31.0, 21.5, 20.6, 0.01. **Anal** Cal'c for C<sub>20</sub>H<sub>29</sub>NO<sub>3</sub>SSi: C, 61.34; H, 7.46; N, 3.58. Found: C, 61.18; H, 7.47; N, 3.68.

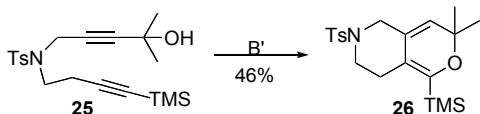

Procedure: B' for 8 hr (a small amount of a less polar compound, presumably the isomerized compound is formed upon extended heating, but can be easily separated by silica gel chromatography).

R<sub>f</sub> (20% Et<sub>2</sub>O/PE):. **IR** (neat): 2971, 2926, 2945, 1598, 1461, 1348, 1248, 1165, 1091, 1019, 952, 929, 900, 840, 747, 711, 660. **<sup>1</sup>H NMR** (400 MHz, C<sub>6</sub>D<sub>6</sub>): 7.68 (d, J = 8 Hz, 2H), 6.81 (d, J = 8 Hz, 2H), 4.56 (t, J = 1.6 Hz, 1H), 3.62 (d, J = 1.6 Hz, 2H), 2.94 (t, J = 6 Hz, 2H), 2.16 (t, J = 6 Hz, 2H), 1.93 (s, 3H), 1.15 (s, 6H), 0.12 (s, 9H). **<sup>13</sup>C NMR** (100 MHz, C<sub>6</sub>D<sub>6</sub>): 153.6, 142.9, 134.6, 129.5, 128.3, 126.1, 121.3, 118.5, 73.3, 48.4, 45.7, 26.6, 25.1, 21.1, -1.3. **HRMS** (EI, [M]<sup>+</sup>) Cal'c for C<sub>20</sub>H<sub>29</sub>NO<sub>3</sub>SSi: 391.1637. Found: 391.1625 (0.9), 376.1405 (8.2), 308.1136 (7.7), 280.0997 (89.8).

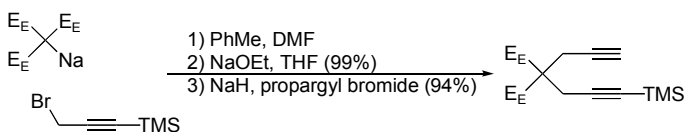

(Procedure based on Brummond, K. M.; Chen, H.; Fisher, K. D.; Kerekes, A. D.; Rickards, B.; Sill, P. C.; and J. Geib, S. J. *Org. Lett.*; **2002**, 4, 1931).

To a solution of triethyl sodiomethanecarboxylate (4.0 g, 15.7 mmol) in toluene:DMF (1:1, 50 mL) was added 3-trimethylsilylpropargyl bromide (3.0 g, 15.7 mmol), and the mixture was stirred and heated at 80 °C overnight. The resulting yellow suspension was cooled to room temperature, diluted with toluene (100 mL), washed with water, saturated Na<sub>2</sub>CO<sub>3</sub>, and brine. The combined aqueous layers were extracted with toluene and the combined organic layers were dried (MgSO<sub>4</sub>), and the solvent was removed in vacuo to afford 2-ethoxycarbonyl-2-(3-trimethylsilyl-2-propynyl)malonic acid diethyl ester as a yellow oil (5.53 g, 99 %).

A solution of this product in THF (20 mL) was added dropwise to a suspension of sodium ethoxide (1.30 g, 1.91 mmol) in THF (30 mL). After stirring at room temperature for 2 h, 1N HCl was added until the solution was acidic. The reaction mixture was then diluted with ether (150 mL), washed with water (30 mL), saturated NaHCO<sub>3</sub> solution, brine, dried (MgSO<sub>4</sub>), concentrated in vacuo, and purified on silica (25% ether/pet. ether) to afford 2-(3-trimethylsilyl-2-propynyl)malonic acid diethyl ester (4.15 g, 100 %).

To a suspension of NaH (720 mg, 18 mmol) in THF (20 mL) at 0 °C was added a solution of the product of the previous reaction (4.05 g, 15 mmol) in THF (20 mL).

Following stirring for 30 minutes, propargyl bromide (1.67 mL of an 80% solution in toluene, 15 mmol) was added, and the reaction was stirred an additional 3 hours. Water was then added, and extracted with ether, and dried over Na<sub>2</sub>SO<sub>4</sub>. The solvent removed in vacuo and the crude product was purified on silica (10% ether/pet. ether) to yield 2-prop-2-ynyl-2-(3-trimethylsilanyl-prop-2-ynyl)-malonic acid diethyl ester (4.34 g, 94%).

R<sub>f</sub> (40% Et<sub>2</sub>O/PE): 0.80. **IR** (neat): 3286, 2962, 2180, 1740, 1427, 1367, 1288, 1207, 1031, 845, 761, 643 cm<sup>-1</sup>. **<sup>1</sup>H NMR** (500 MHz, CDCl<sub>3</sub>): 4.19 (m, 4H), 2.96 (s, 2H), 2.93 (d, J = 3 Hz, 2H), 1.99 (t, J = 3 Hz, 1H), 1.23 (t, J = 7.2 Hz, 6H), 0.09 (s, 9H). **<sup>13</sup>C NMR** (125 MHz, CDCl<sub>3</sub>): 168.8, 101.0, 88.5, 78.9, 71.7, 62.2, 56.8, 24.1, 22.7, 14.2, 0.1. **Anal** Cal'c for C<sub>16</sub>H<sub>24</sub>O<sub>4</sub>Si: C, 62.30; H, 7.84. Found: C, 62.48; H, 8.01.

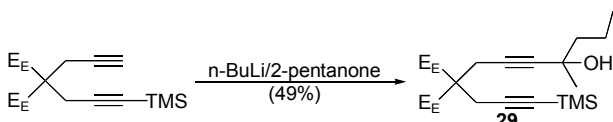

To a solution of 2-prop-2-ynyl-2-(3-trimethylsilanyl-prop-2-ynyl)-malonic acid diethyl ester (308 mg, 1 mmol) in THF (10 mmol) at -78 °C was added n-BuLi (0.4 mL of a 2.5 M solution in hexanes, 1 mmol), and after stirring for 30 minutes, 2-pentanone (103 mg, 1.2 mmol) was added dropwise. The reaction mixture was stirred 30 minutes, quenched with saturated ammonium chloride, extracted with ether, dried over Na<sub>2</sub>SO<sub>4</sub>, and the solvent was removed in vacuo. The resulting crude product was then purified on silica (20% ether/pet. ether) to yield **29** (193 mg, 49%).

R<sub>f</sub> (40% Et<sub>2</sub>O/PE): 0.45. **IR** (neat): 3498, 2960, 2180, 1741, 1466, 1367, 1289, 1251, 1192, 1031, 845, 761 cm<sup>-1</sup>. **<sup>1</sup>H NMR** (500 MHz, CDCl<sub>3</sub>): 4.17 (m, 4H), 2.93 (s, 2H), 2.92 (s, 2H), 1.90 (bs, 1H), 1.65-1.40 (m, 4H), 1.39 (s, 3H), 1.22 (t, J = 7 Hz, 6H), 0.91 (t, J = 7.2 Hz, 3H), 0.10 (s, 9H). **<sup>13</sup>C NMR** (125 MHz, CDCl<sub>3</sub>): 168.9, 101.1, 88.4, 87.6, 78.1, 68.4, 62.1, 57.0, 46.2, 30.1, 24.1, 22.9, 18.2, 14.4, 14.3, 0.1. **Anal** Cal'c for C<sub>21</sub>H<sub>34</sub>O<sub>5</sub>Si: C, 63.92; H, 8.69. Found: C, 64.12; H, 8.74.

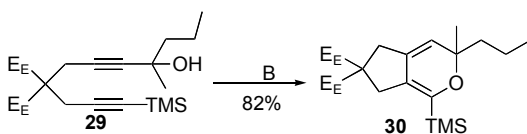

Procedure: B for 1.5 hr.

R<sub>f</sub> (20% Et<sub>2</sub>O/PE):. **IR** (neat): 2960, 1736, 1447, 1366, 1247, 1186, 1155, 1070, 840. **<sup>1</sup>H NMR** (500 MHz, C<sub>6</sub>D<sub>6</sub>): 4.82 (t, J = 2 Hz, 1H), 3.95 (q, J = 7.2 Hz, 4H), 3.31 (d, J = 2 Hz, 2H), 3.15 (t, J = 2.5 Hz, 2H), 1.6-1.3 (m, 4H), 1.26 (s, 3H), 0.90 (t, J = 7.2 Hz, 6H), 0.89 (m, 3H), 0.23 (s, 9H). **<sup>13</sup>C NMR** (125 MHz, C<sub>6</sub>D<sub>6</sub>): 171.0, 151.5, 134.1, 123.0, 115.8, 76.3, 61.3, 60.0, 43.7, 38.1, 36.5, 25.8, 17.6, 14.7, 13.9, -1.9. **HRMS** (EI, [M]<sup>+</sup>) Cal'c for C<sub>21</sub>H<sub>34</sub>O<sub>5</sub>Si: 394.2176. Found: 394.2173 (52.1), 379.1931 (57.9), 351.1602 (100)..

## Supporting Materials

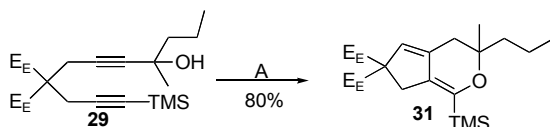

Procedure: A for 2 hr (product still contains a small amount of **30**).

Rf (20% Et<sub>2</sub>O/PE):. **IR** (neat): 2959, 1735, 1467, 1446, 1366, 1247, 1186, 1154, 1070, 839. **<sup>1</sup>H NMR** (400 MHz, C<sub>6</sub>D<sub>6</sub>): 5.84 (t, J = 1.6 Hz, 1H), 3.98 (m, 4H), 3.63 (d, J = 16 Hz, 1H), 3.58 (d, J = 16 Hz, 1H), 2.25 (dd, J<sub>1</sub> = 15.6 Hz, J<sub>2</sub> = 1.6 Hz, 2H), 1.30 (m, 4H), 1.06 (s, 3H), 0.93 (t, J = 7 Hz, 6H), 0.82 (t, J = 7 Hz, 3H), 0.20 (s, 9H). **<sup>13</sup>C NMR** (100 MHz, C<sub>6</sub>D<sub>6</sub>): 170.9, 150.6, 140.3, 128.5, 122.1, 75.0, 65.8, 42.2, 35.3, 35.0, 29.9, 23.2, 17.0, 14.7, 13.9, -1.9. **HRMS** (EI, [M]<sup>+</sup>) Cal'c for C<sub>21</sub>H<sub>34</sub>O<sub>5</sub>Si: 394.2176. Found: 394.2173 (42.4), 351.1606 (82.6), 73.0474 (100)..

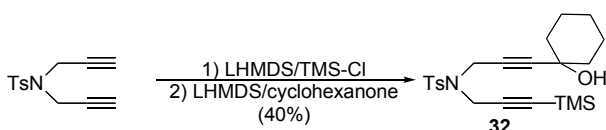

To a solution of bispropargylsilylamine (0.505 g, 2.04 mmol) in THF (8 mL) cooled to -78 °C was added LHMDS (4.08 mL of 0.5 M solution in THF, 2.04 mmol). After stirring for 45 minutes, TMS-Cl (0.26 mL, 2.04 mmol) was added and stirred for 30 minutes. A second aliquot of LHMDS (4.9 mL of 0.5 M solution in THF, 2.45 mmol) was added and stirred 30 minutes. Freshly distilled cyclohexanone (0.317 mL, 3.06 mmol) was then added and the reaction was stirred 1 hour more. Saturated ammonium chloride was then added to the reaction at -78 °C and the mixture was warmed to room temperature, extracted with ether, dried over MgSO<sub>4</sub>, and the solvent removed in vacuo. The crude product was then purified using silica gel chromatography (35% ether/pet. ether) to yield 340 mg of **32** (40%).

Rf (40% Et<sub>2</sub>O/PE):0.3. mp = 85-87 °C. **IR** (neat): 3520, 2934, 2858, 2179, 1597, 1494, 1446, 1353, 1250, 1164, 1094, 1002, 965, 846, 846, 759, 667 cm<sup>-1</sup>. **<sup>1</sup>H NMR** (500 MHz, CDCl<sub>3</sub>): 7.69 (d, J = 8.5 Hz, 2H), 7.28 (d, J = 8.5 Hz, 2H), 4.17 (s, 2H), 4.13 (s, 2H), 2.40 (s, 3H), 1.77 (bs, 1H), 1.69-1.56 (m, 5H), 1.45-1.31 (m, 5H), 0.03 (s, 9H). **<sup>13</sup>C NMR** (100 MHz, CDCl<sub>3</sub>): 143.9, 135.4, 129.7, 128.1, 97.5, 91.3, 89.5, 76.6, 68.6, 39.7, 37.3, 36.5, 25.1, 23.3, 21.6, -0.3. **Anal** Cal'c for C<sub>22</sub>H<sub>31</sub>NO<sub>3</sub>SSi: C, 63.27; H, 7.48. Found: C, 63.24; H, 7.46.

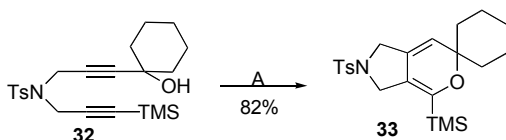

Procedure: A for 1 hr.

Rf (25% Et<sub>2</sub>O/PE): 0.45. **IR** (neat): 2932, 2857, 1597, 1448, 1349, 1248, 1164, 1091, 840, 666. **<sup>1</sup>H NMR** (400 MHz, C<sub>6</sub>D<sub>6</sub>): 7.75 (d, J = 8.4 Hz, 2H), 6.76 (d, J = 8.4 Hz, 2H), 4.56 (bs, 1H), 4.18 (s, 2H), 3.87 (d, J = 2 Hz, 2H), 1.88 (s, 3H), 1.76 (m, 2H), 1.58 (m, 2H), 1.44 (m, 2H), 1.30 (m, 2H), 1.15 (m, 2H), 0.05 (s, 9H). **<sup>13</sup>C NMR** (100 MHz, C<sub>6</sub>D<sub>6</sub>):

151.9, 143.1, 134.4, 131.2, 129.7, 128.1, 120.9, 114.8, 74.8, 50.7, 49.6, 35.9, 25.7, 21.8, 21.0, -2.2. **Anal** Cal'c for  $C_{22}H_{31}NO_3SSi$ : C, 63.27; H, 7.48. Found: C, 63.43; H, 7.38.

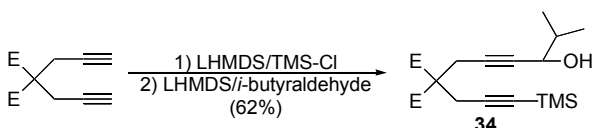

To a solution of dimethyl(bis)propargyl malonate (0.3 g, 1.44 mmol) in THF (10 mL) cooled to  $-78\text{ }^{\circ}\text{C}$  was added LHMDS (1.6 mL of 0.9 M solution in THF, 1.44 mmol). After stirring for 30 minutes, TMS-Cl (0.18 mL, 1.44 mmol) was added and stirred for 1.5 hours. A second aliquot of LHMDS (1.9 mL of 0.9 M solution in THF, 1.73 mmol) was added and stirred 30 minutes. Freshly distilled *i*-butylaldehyde (0.2 mL, 2.16 mmol) was then added and the reaction was stirred 1 hour more. Saturated ammonium chloride was then added to the reaction at  $-78\text{ }^{\circ}\text{C}$  and the mixture was warmed to room temperature, extracted with ether, dried over  $MgSO_4$ , and the solvent removed in vacuo. The crude product was then purified using silica gel chromatography (40% ether/pet. ether) to yield 310 mg of **34** (62%).

R<sub>f</sub> (40% Et<sub>2</sub>O/PE): 0.35. **IR** (neat): 3501, 2958, 2987, 2180, 1744, 1436, 1324, 1293, 1251, 1211, 1029, 844, 761, 644  $\text{cm}^{-1}$ . **<sup>1</sup>H NMR** (400 MHz,  $CDCl_3$ ): 4.11 (dt,  $J_1 = 5.6$  Hz,  $J_2 = 2$  Hz, 1H), 3.72 (s, 6H), 2.98 (d,  $J = 2$  Hz, 2H), 2.95 (s, 2H), 1.80 (m, 1H), 1.68 (bs, 1H), 0.93 (t,  $J = 6.8$  Hz, 6H), 0.10 (s, 9H). **<sup>13</sup>C NMR** (75 MHz,  $CDCl_3$ ): 169.2, 100.6, 88.5, 83.3, 79.8, 67.7, 56.9, 52.9, 34.4, 24.1, 22.9, 18.0, 17.1, -0.1. **HRMS** (EI,  $[M-CH_3]^+$ ) Cal'c for  $C_{17}H_{25}O_5Si$ : 337.1471. Found: 337.1467 (5.1), 309.1163 (12.5), 277.1225 (13.7), 249.0934 (32.7), 73.0496 (100).

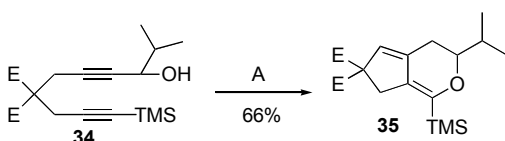

Procedure: A for 2 hr.

R<sub>f</sub> (30% Et<sub>2</sub>O/PE): 0.5. **IR** (neat): 2957, 1738, 1606, 1434, 1248, 1196, 1171, 1151, 1082, 841, 756, 697. **<sup>1</sup>H NMR** (500 MHz,  $C_6D_6$ ): 5.70 (d,  $J = 1.5$  Hz, 1H), 3.63 (d,  $J = 16.5$  Hz, 1H), 3.58 (d,  $J = 16.5$  Hz, 1H), 3.36 (s, 3H), 3.35 (s, 3H), 3.13 (ddd,  $J_1 = 12.25$  Hz,  $J_2 = 6.25$  Hz,  $J_3 = 3.0$  Hz, 1H), 2.22 (dd,  $J_1 = 16.5$  Hz,  $J_2 = 3$  Hz, 1H), 2.09 (ddd,  $J_1 = 16.5$  Hz,  $J_2 = 12.25$  Hz,  $J_3 = 2$  Hz, 1H), 1.61 (oct,  $J = 6.5$  Hz, 1H), 0.91 (d,  $J = 6.5$  Hz, 3H), 0.76 (d,  $J = 6.5$  Hz, 3H), 0.19 (s, 9H). **<sup>13</sup>C NMR** (125 MHz,  $C_6D_6$ ): 171.5, 171.4, 154.3, 141.5, 129.8, 120.8, 79.5, 65.9, 52.3, 34.9, 32.5, 28.4, 18.5, 18.2, -1.8. **HRMS** (EI,  $[M]^+$ ) Cal'c for  $C_{18}H_{28}O_5Si$ : 352.1706. Found: 352.1701 (50.7), 293.1572 (84.2), 73.0480 (100).

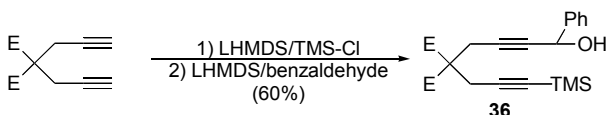

To a solution of dimethyl(bis)propargyl malonate (0.5 g, 2.4 mmol) in THF (20 mL) cooled to  $-78\text{ }^{\circ}\text{C}$  was added LHMDS (2.4 mL of 1 M solution in THF, 2.4 mmol). After

stirring for 30 minutes, TMS-Cl (0.31 mL, 2.4 mmol) was added and stirred for 1.5 hours. A second aliquot of LHMDS (3.6 mL of 1 M solution in THF, 3.6 mmol) was added and stirred 30 minutes. Freshly distilled benzaldehyde (0.37 mL, 3.6 mmol) was then added and the reaction was stirred 1 hour more. Saturated ammonium chloride was then added to the reaction at -78 °C and the mixture was warmed to room temperature, extracted with ether, dried over MgSO<sub>4</sub>, and the solvent removed in vacuo. The crude product was then purified using silica gel chromatography (40% ether/pet. ether) to yield 560 mg of **34** (60%).

R<sub>f</sub> (50% Et<sub>2</sub>O/PE): 0.25. **IR** (neat): 3486, 3021, 2957, 2900, 2180, 1732, 1603, 1494, 1436, 1352, 1294, 1250, 1211, 1139, 1028, 844, 761, 731, 699, 637 cm<sup>-1</sup>. **<sup>1</sup>H NMR** (500 MHz, CDCl<sub>3</sub>): 7.5 (m, 2H), 7.3 (m, 3H), 5.41 (bs, 1H), 3.72 (s, 3H), 3.71 (s, 3H), 3.06 (d, J = 2 Hz, 2H), 2.99 (s, 2H), 0.13 (s, 9H). **<sup>13</sup>C NMR** (125 MHz, CDCl<sub>3</sub>): 169.4, 140.9, 128.8, 128.6, 126.9, 100.9, 88.9, 83.6, 81.7, 64.9, 57.2, 53.3, 24.5, 23.4, 0.2. **Anal** Cal'c for C<sub>21</sub>H<sub>26</sub>O<sub>5</sub>Si: C, 65.26; H, 6.78. Found: C, 65.37; H, 6.80.

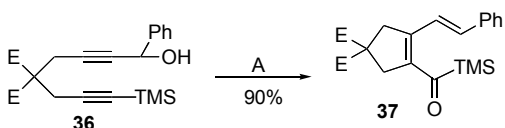

Procedure: A for 2 hr (product contains a trace amount of impurity (possibly [6H]-pyran).

R<sub>f</sub> (20% Et<sub>2</sub>O/PE):. **IR** (neat): 2954, 2842, 1737, 1613, 1576, 1535, 1493, 1434, 1252, 1199, 1170, 1075, 969, 843, 823, 752, 692. **<sup>1</sup>H NMR** (400 MHz, C<sub>6</sub>D<sub>6</sub>): 8.15 (d, J = 16.4 Hz, 1H), 7.32 (m, 2H), 7.02 (m, 3H), 6.68 (d, J = 16.4 Hz, 1H), 3.75 (s, 2H), 3.55 (s, 2H), 3.12 (s, 6H), 0.19 (s, 9H). **<sup>13</sup>C NMR** (100 MHz, C<sub>6</sub>D<sub>6</sub>): 235.3, 171.6, 141.9, 138.8, 136.9, 128.8, 128.6, 128.4, 127.4, 123.8, 58.0, 52.5, 42.1, 41.1, -2.6. **Anal** Cal'c for C<sub>21</sub>H<sub>26</sub>O<sub>5</sub>Si: C, 65.26; H, 6.78. Found: C, 65.14; H, 6.81.

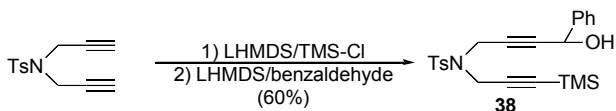

To a solution of bispropargyltosylamine (0.514 g, 2.08 mmol) in THF (25 mL) cooled to -78 °C was added LHMDS (4.16 mL of 0.5 M solution in THF, 2.08 mmol). After stirring for 30 minutes, TMS-Cl (0.26 mL, 2.08 mmol) was added and stirred for 30 minutes. A second aliquot of LHMDS (4.99 mL of 0.5 M solution in THF, 2.49 mmol) was added and stirred 30 minutes. Freshly distilled benzaldehyde (0.317 mL, 3.12 mmol) was then added and the reaction was stirred 1 hour more. Saturated ammonium chloride was then added to the reaction at -78 °C and the mixture was warmed to room temperature, extracted with ether, dried over MgSO<sub>4</sub>, and the solvent removed in vacuo. The crude product was then purified using silica gel chromatography (40% ether/pet. ether) to yield 530 mg of **38** (60%).

R<sub>f</sub> (20% Et<sub>2</sub>O/PE):. **IR** (neat): 3508, 3064, 3032, 2960, 2899, 2280, 2179, 1598, 1494, 1454, 1352, 1250, 1163, 1094, 1002, 905, 846, 814, 757, 699, 665 cm<sup>-1</sup>. **<sup>1</sup>H NMR** (400 MHz, C<sub>6</sub>D<sub>6</sub>): 7.64 (m, 2H), 7.33 (m, 2H), 7.16-7.04 (m, 3H), 6.75 (m, 2H), 5.07 (app. bd, J = 5.6 Hz, 1H), 4.21 (d, J = 1.6 Hz, 2H), 4.17 (s, 2H), 1.92 (bd, J = 5.6 Hz, 1H), 1.90 (s,



## Supporting Materials

3H), -0.005 (s, 9H). **<sup>13</sup>C NMR** (100 MHz, C<sub>6</sub>D<sub>6</sub>): 143.4, 141.0, 136.2, 129.6, 128.6, 126.8, 98.6, 90.9, 86.3, 79.2, 64.3, 37.6, 36.9, 21.1. **Anal** Cal'c for C<sub>23</sub>H<sub>27</sub>NO<sub>3</sub>SSi: C, 64.90; H, 6.39; N, 3.29. Found: C, 64.92; H, 6.46; N, 3.17.

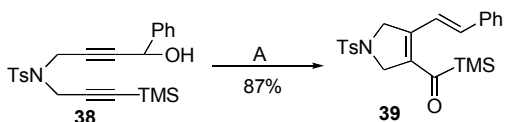

Procedure: A for 1hr.

R<sub>f</sub> (20% Et<sub>2</sub>O/PE):. reddish crystals mp = 120-122 **IR** (neat): 2923, 2853, 1618, 1597, 1546, 1493, 1448, 1347, 1250, 1165, 1098, 843, 816, 752, 667. **<sup>1</sup>H NMR** (400 MHz, C<sub>6</sub>D<sub>6</sub>): 7.82 (d, J = 8 Hz, 2H), 7.80 (d, J = 16 Hz, 1H), 7.25 (m, 2H), 7.02 (m, 3H), 6.78 (d, J = 8 Hz, 2H), 6.37 (d, J = 16 Hz, 1H), 4.67 (t, J = 3.6 Hz, 2H), 4.48 (dd, J<sub>1</sub> = 4 Hz, J<sub>2</sub> = 3.2 Hz, 2H), 1.85 (s, 3H), 0.04 (s, 9H). **<sup>13</sup>C NMR** (100 MHz, C<sub>6</sub>D<sub>6</sub>): 233.1, 143.4, 139.5, 137.8, 136.4, 135.4, 134.9, 129.9, 129.2, 129.0, 127.8, 12.5, 121.2, 56.0, 55.2, 21.0, -2.7. **HRMS** (EI, [M]<sup>+</sup>) Cal'c for C<sub>23</sub>H<sub>27</sub>NO<sub>3</sub>SSi: 425.1481. Found: 425.1488(37.6), 242.1264 (78.5).

# Supporting Materials

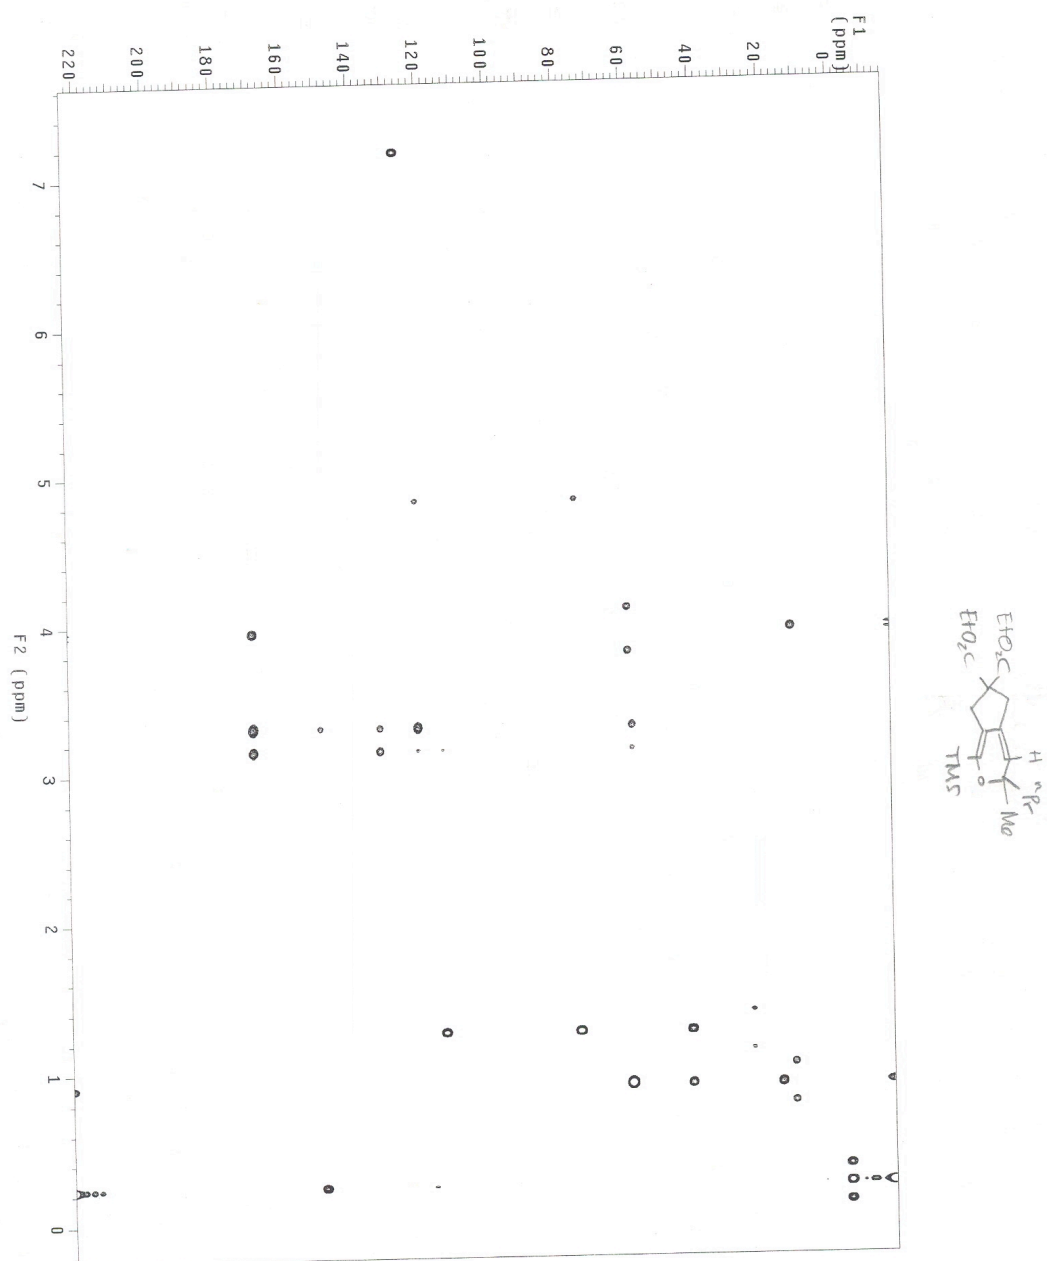

# Supporting Materials

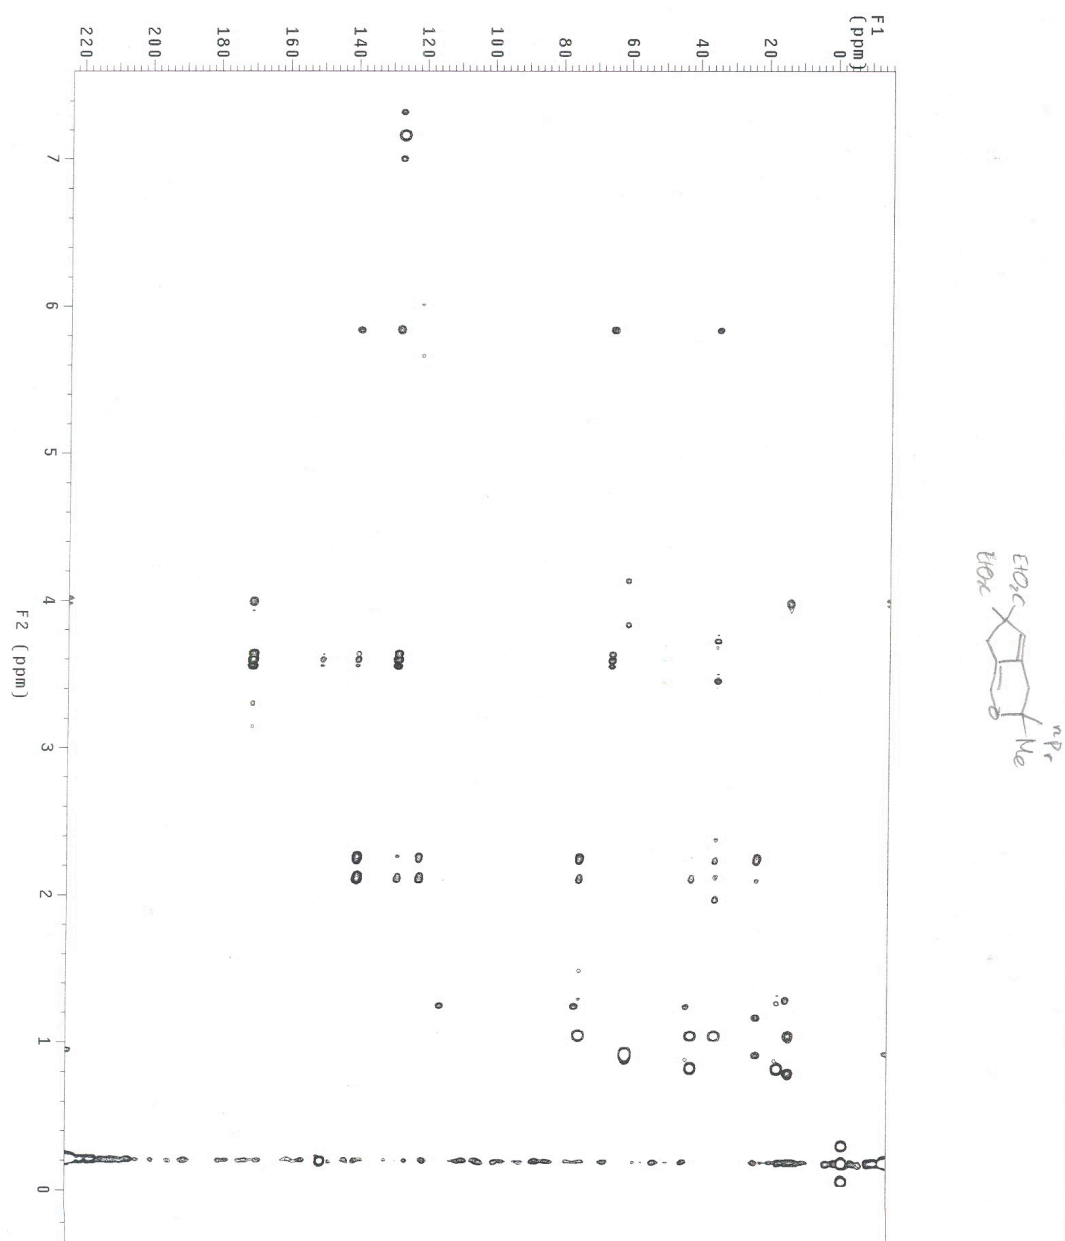

## Supporting Materials

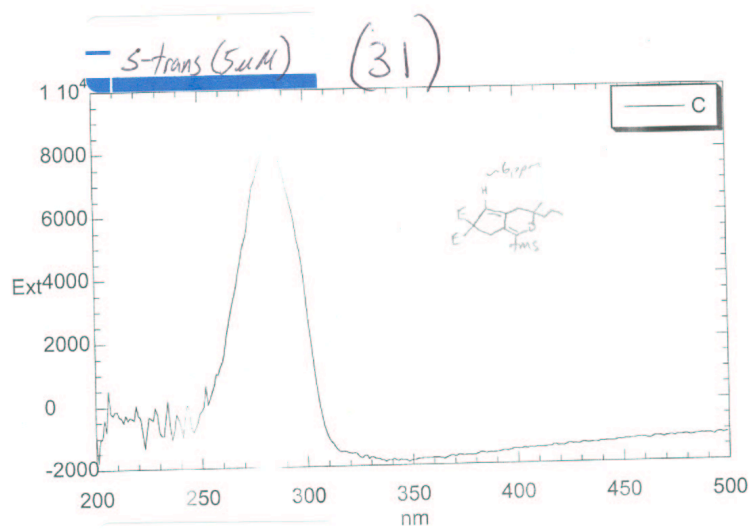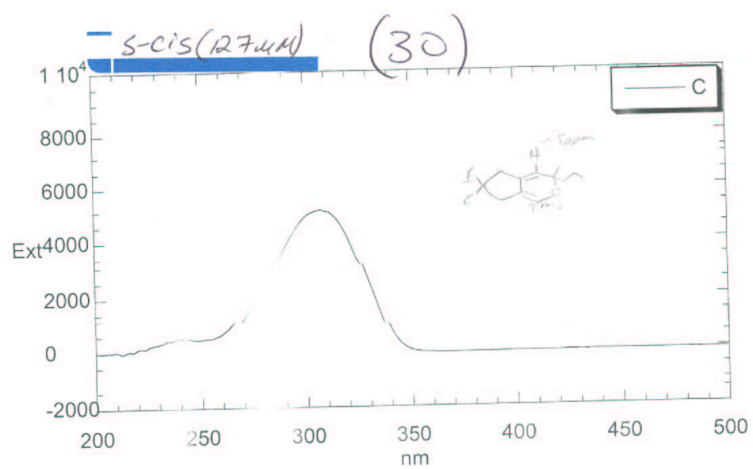



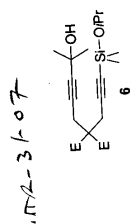

STANDARD IN OBSERVE

```

exp1 stdth
date 19 2004 DEC. & VT
solvent Jul Benzene dn H1
file ACQUISITION exp 30
sfrq 400.114 dm 0
tn 400.114 dm nmC
at 4.002 dmf 200
np 40000 wfile PROCESSING
ad 4997.5 wfile
fb not used proc ft
bs 4 fn not used
tpwr 60
pw 8.0 werr
nt 0.500 wexp
nt 16 wnt
ct 4
adack not used
gath FLAGS
il n
in n
dp n
DISPLAY
sp -462.3
wp 4997.5
sc 100
wc 250
hzmm 19.99
ls 291.91
rfp 462.50
th 31
ins cdc ph
nm 6.000

```

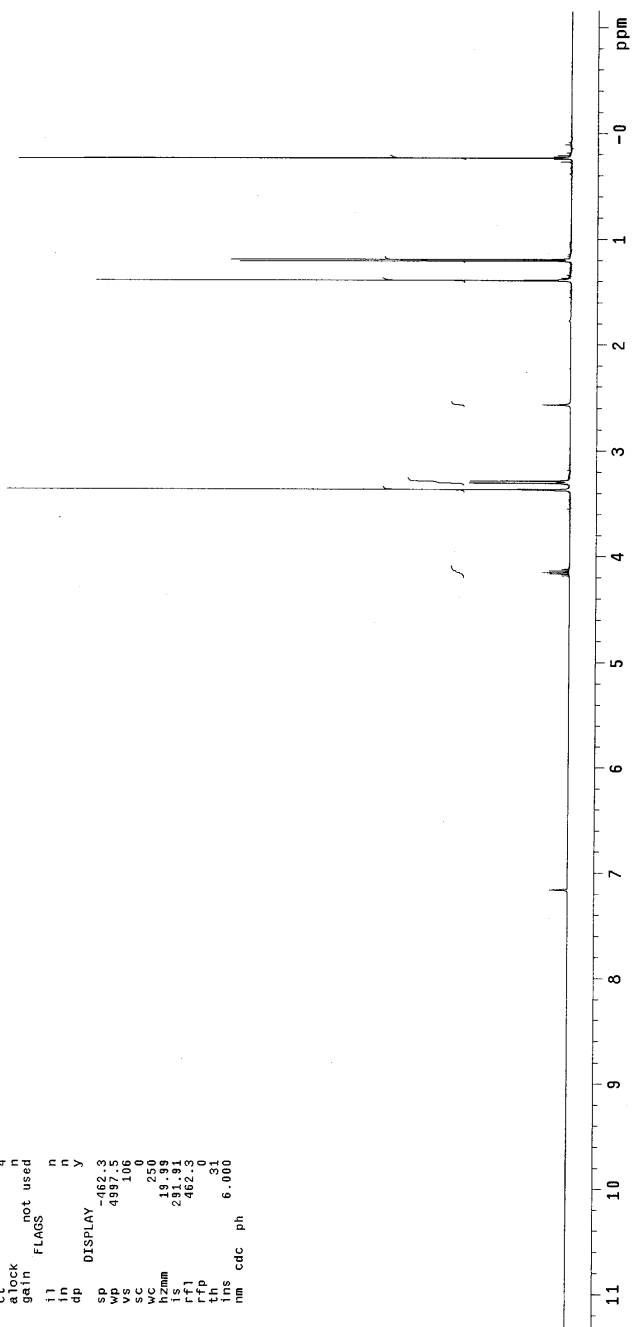



1H SENSITIVITY  
0.1%ETHYLBENZENE

exp1 s2pu1

|             |             |       |            |
|-------------|-------------|-------|------------|
| date        | Jan 14 2003 | dn    | DEC. & VT  |
| solvent     | CDC13       | dof   | H1         |
| file        | exp         | dm    | -776.0     |
| nmr         | dm          | nm    | nm         |
| ACQUISITION | exp         | dm    | C          |
| sfrq        | 500.049     | dm    | not used   |
| tr          | H1          | dip   | 0.5        |
| at          | 2.000       | dip   | 1023       |
| np          | 16000       | lb    | PROCESSING |
| pw          | 4000.0      | fr    | 20         |
| fls         | 2250        | fr    | 32768      |
| bs          | 4           |       |            |
| pw          | 11.5        | werrf |            |
| pw          | 11.5        | wexp  |            |
| to          | 0           | to    |            |
| nt          | 16          | wt    | DISPLAY    |
| ct          | 16          | sp    | -499.6     |
| alock       | n           | wp    | 4000.0     |
| gain        | not used    | sc    | 0          |
| il          | FLAGS       | WC    | 250        |
| in          | n           | hzmm  | 3.24       |
| dp          | y           | rf1   | 399.78     |
|             |             | rf2   | 499.0      |
|             |             | th    | 4          |
|             |             | ins   | 6.000      |
|             |             | nm    | ph         |

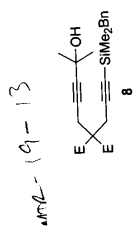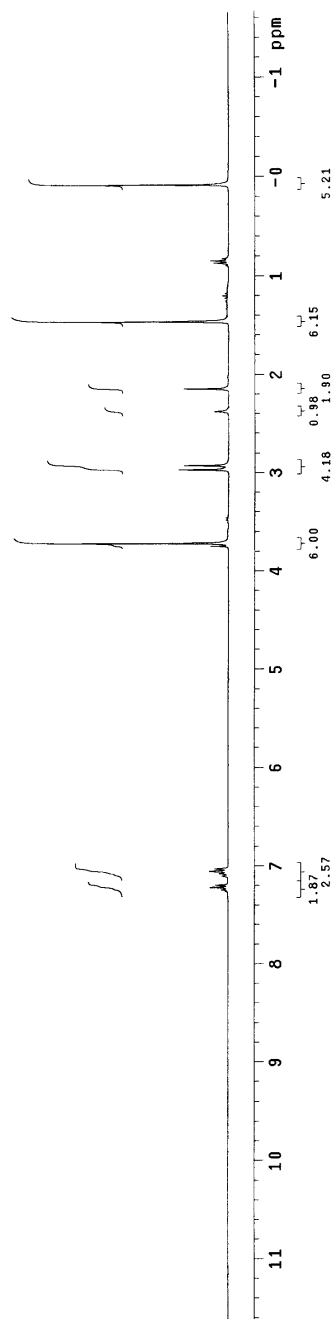



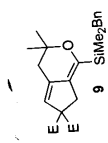

1H SENSITIVITY  
0.12ETHYL BENZENE  
exp3 szpu1

SAMPLE DEC. & VT  
date Jan 14 2003 dn H1  
solvent Benzene dof -776.0  
file exp dm mn  
ACQUISITION 049 dm c  
sfrq 500. H1 not used  
in dm 0.5  
at 2.000 dtp 1023  
np 16000 lb PROCESSING  
wa 4000.0 f 20  
fb 2250 fn 32768  
bs 4  
pw 11.5 werr  
pw 11.5 wexp  
pw 0.0000000000  
to 0  
nt 16 sp  
ct 16 sp -489.3  
alock n wp 4000.0  
gain not used SC 50  
flags n wc 250  
il n hzmm 16.00  
in y 2275.99  
dp y rfp 489.3  
th 6  
nm 2.000  
ph

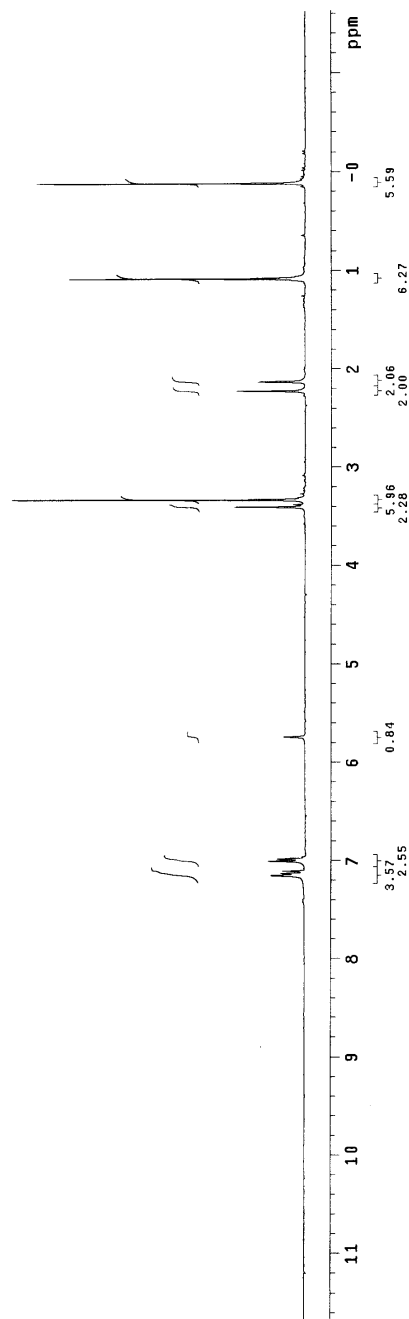

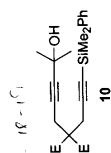

STANDARD IN OBSERVE

```

exp1 stdih
SAMPLE
date Dec 2.2002 dfrq DEC. 400.114
solvent CDC13 dn H1
file ACQUISITION exp 30
sfrq 400.114 dpr 30
tn 4.002 dm nmC
at 4.002 dmf 200
np 40000 wifile
bs not used proc ft
tpwr 60 fn not used
dw 20 werr
tof 0.500 wssp
nt 16 wnt
ct 16
gain not used
flags n
il n
in n
dp y
DISPLAY
sp -480.0
wp 4897.5
sc 70
wc 250
hzmm 19.99
ls 337.32
rfn 480.0
rfp 0
th 5
ins cdc ph
nm 6.000

```

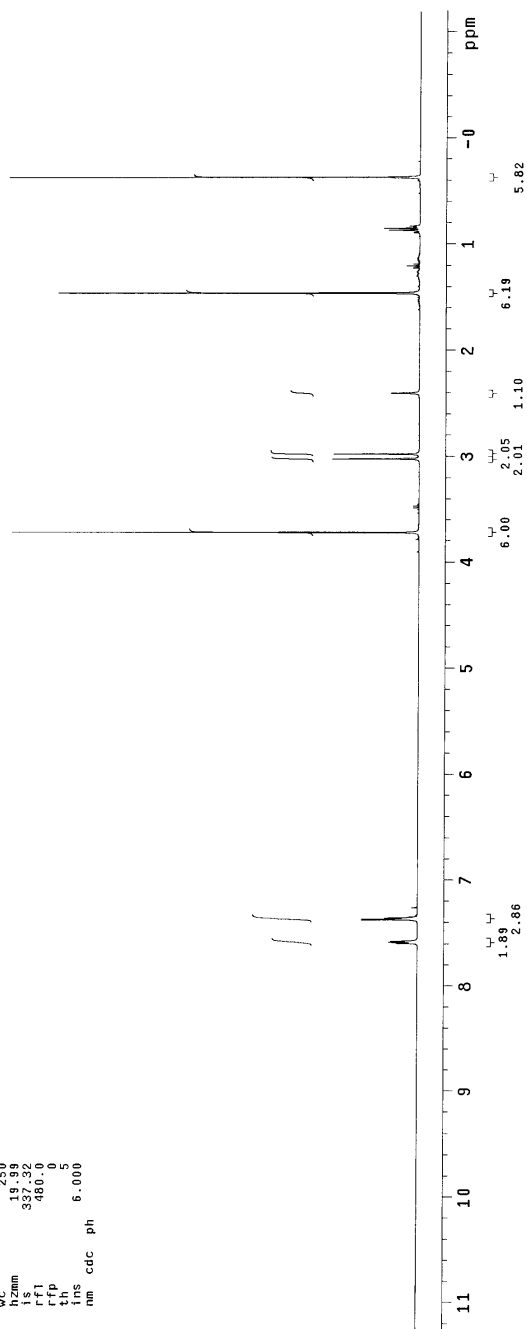

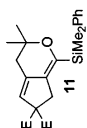

## STANDARD 1H OBSERVE

```

exp3 stdih
date Dec 2002 dfrq DEC. & VT
solvent Benzene dn 400.113
file file exp dpwr H1
ACQUISITION exp 30
sfrq 400.114 dof -188.7
dm dm mn
at 4.002 dmf 200
np 40000
sw 4997.5 wfile PROCESSING
bs not used proc ft
ns not used fn not used
tpwr 60
pw 7.0 werr
di 0.500 wexp
ct 16 wnt
nt 16
alock n
gain not used
il n
in n
dp n
DISPLAY y
sp -480.0
wp 4997.5
vs 70
sc 0
h2mm 250
is 19.99
rfl 247.61
rfi 480.0
trp 6
tms cdc
nm 6.000
nm cdc ph

```

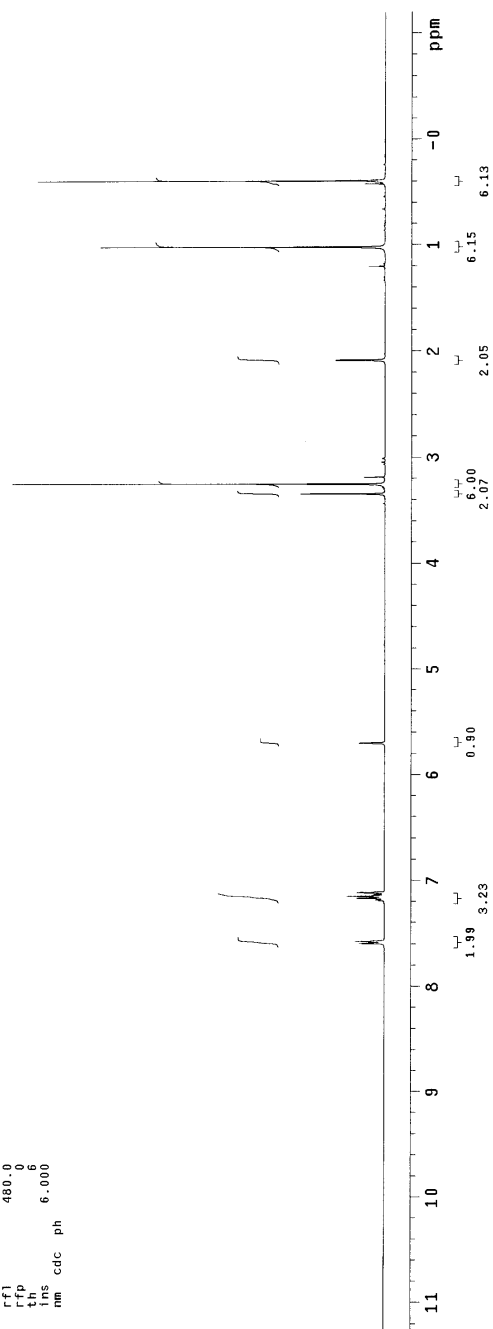

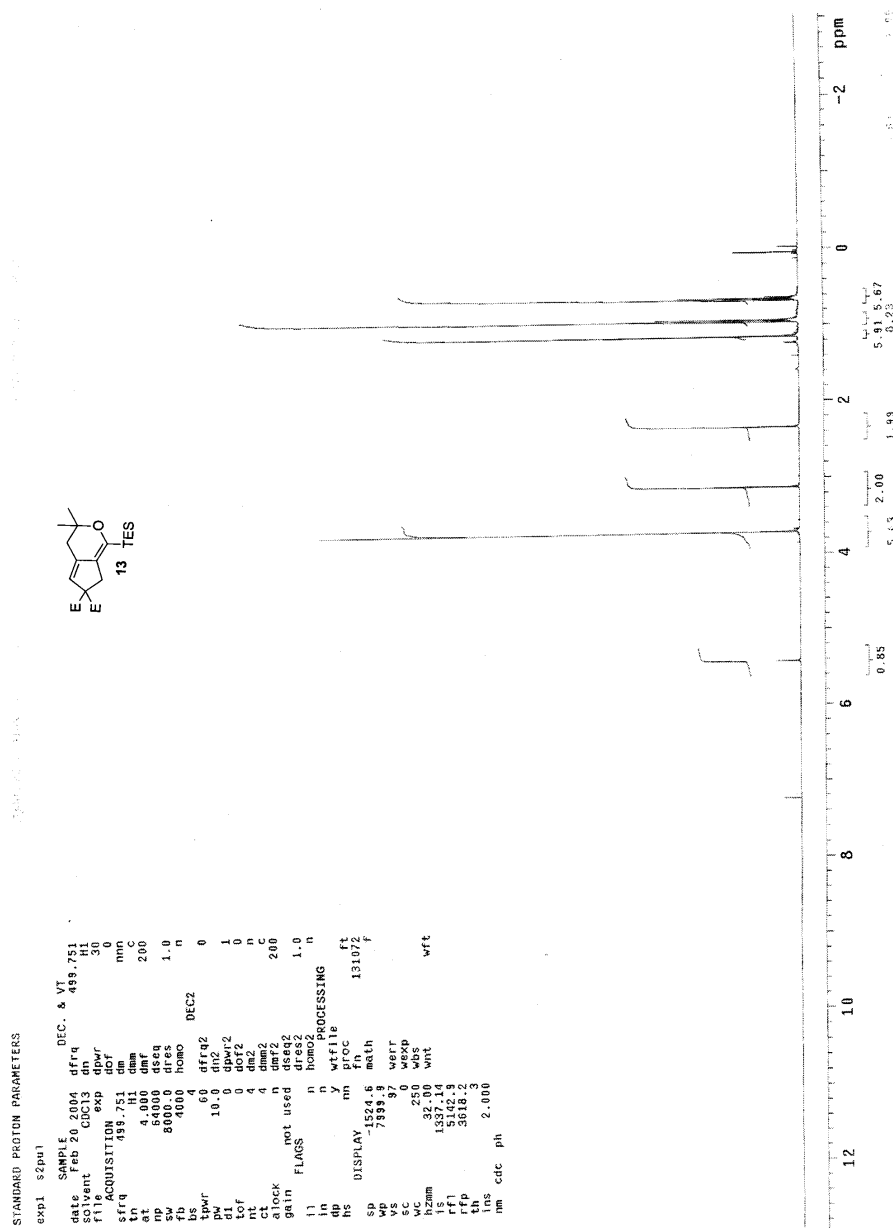

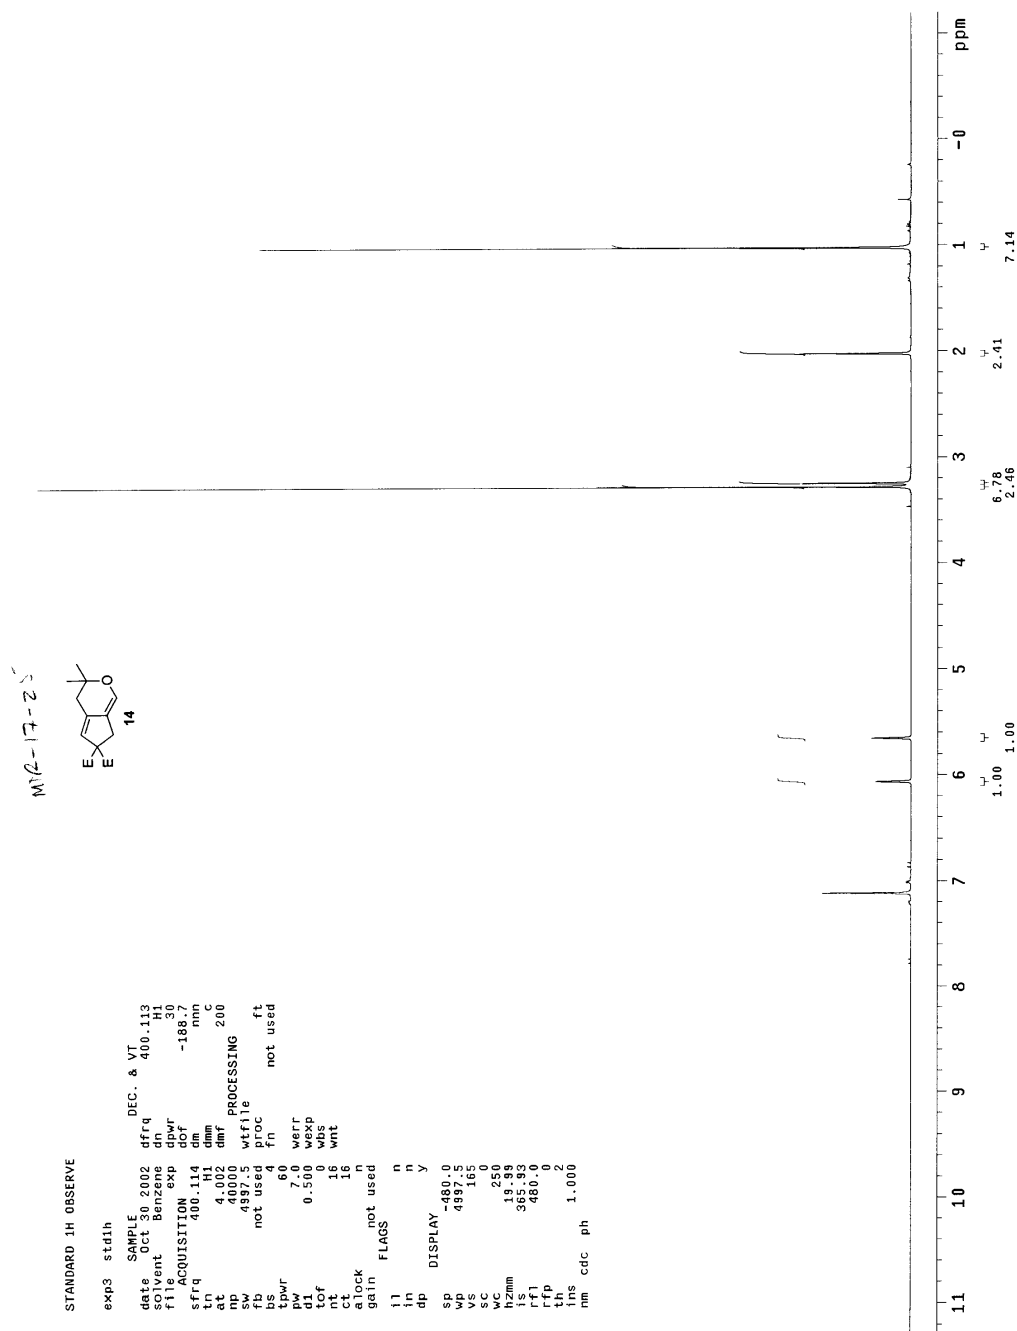

M76-30-12

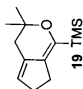

STANDARD 1H OBSERVE

expi stdih

SAMPLE DEC. & VT  
 date Apr 29 2004 dfrq 400.114  
 solvent Benzene d1  
 file exp dpr 30  
 ACQUISITION  
 sfrq 400.114 dnf 0  
 tr 400.114 dnm 200  
 at 4.002 dmf  
 np 40000  
 sw 4937.5 wfile  
 bs not used f1 not used  
 tpwr 60  
 pw 8.0 werr  
 pl 0.500 wexp  
 rf 16 wnt  
 ct 4  
 alock n  
 gelin not used  
 flags  
 il n  
 in n  
 dp y  
 DISPLAY  
 sp -462.3  
 wp 4937.5  
 vs 150  
 sc 0  
 hz 250  
 hzmm 19.99  
 ls 281.92  
 rfl 3227.1  
 rfp 2667.0  
 th 6.000  
 ins  
 nm cdc ph

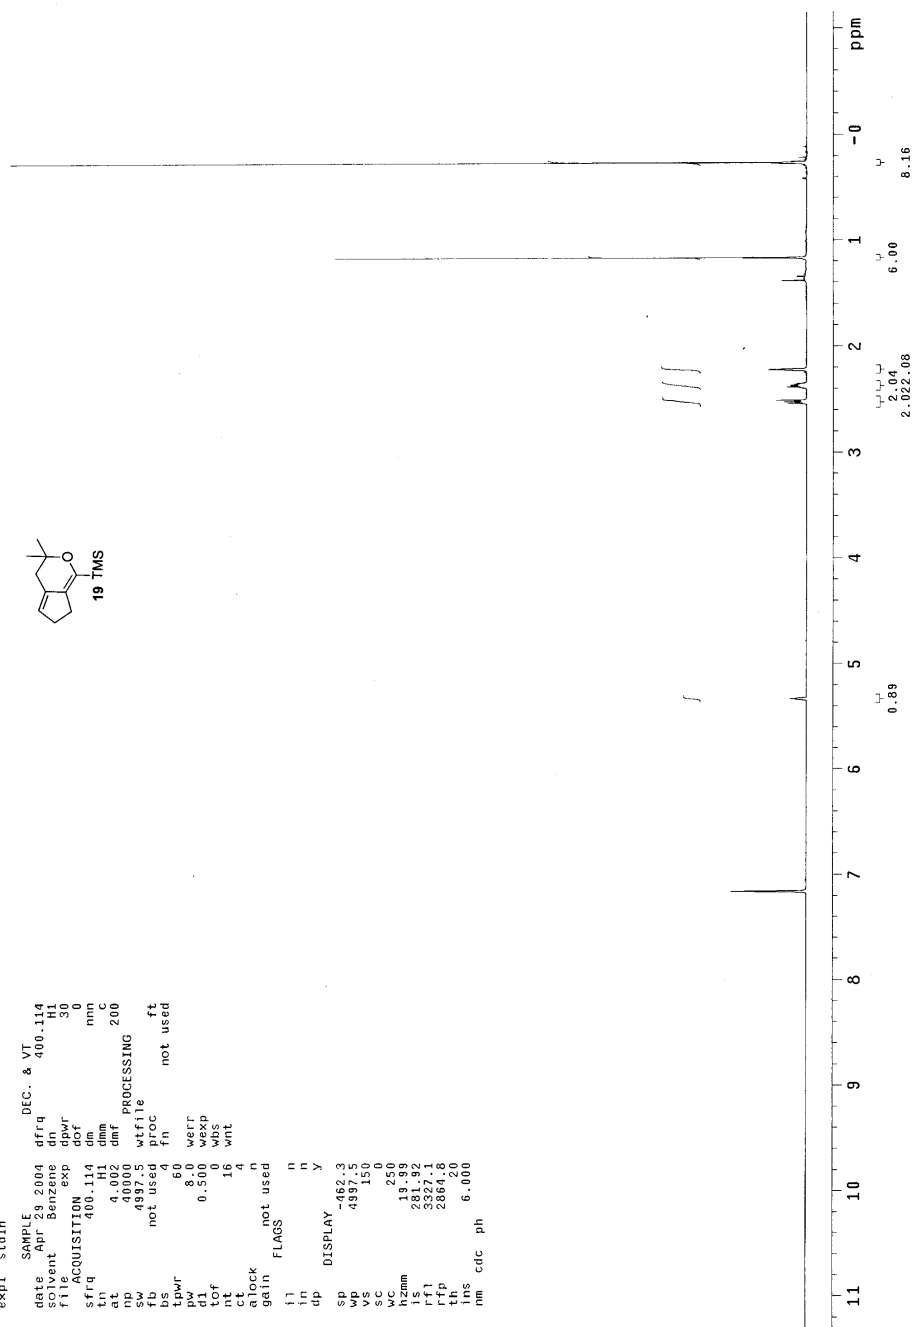

# Supporting Materials

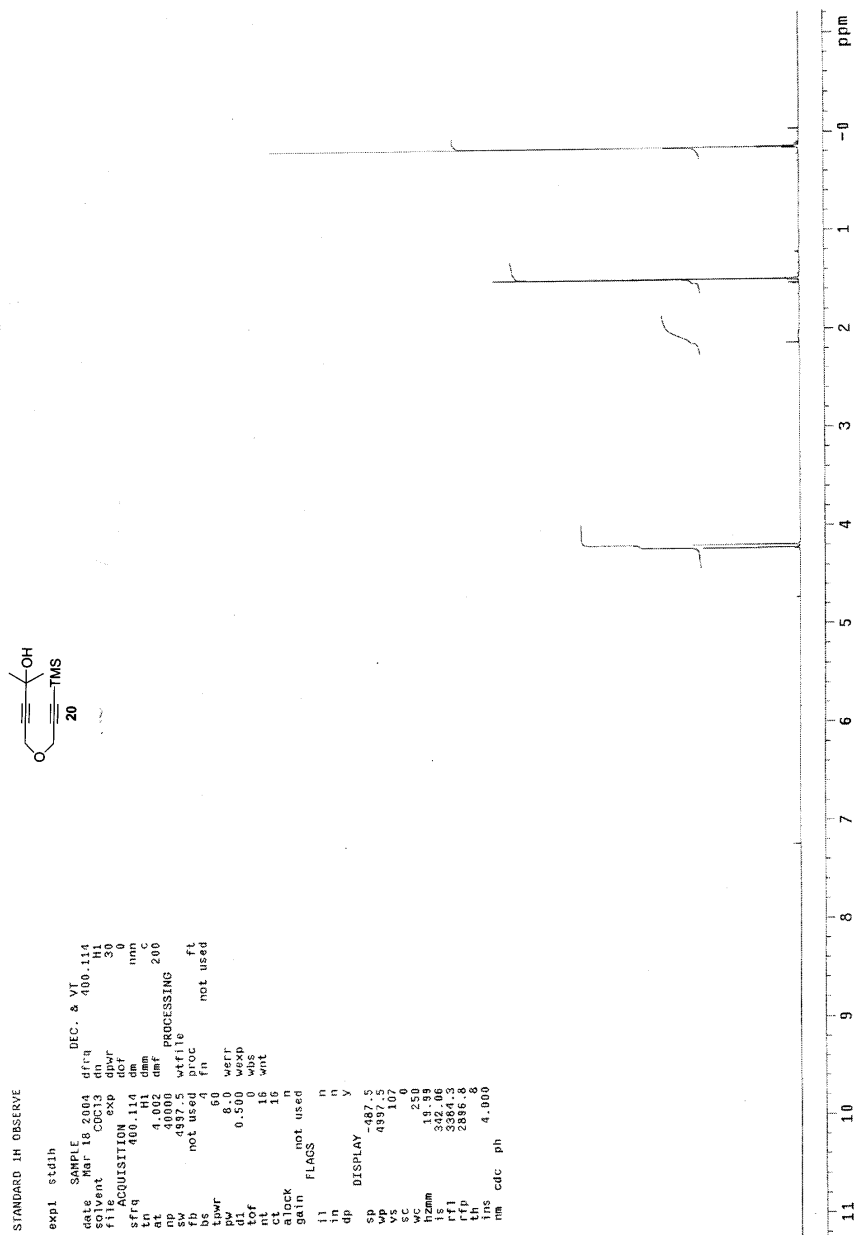

# Supporting Materials

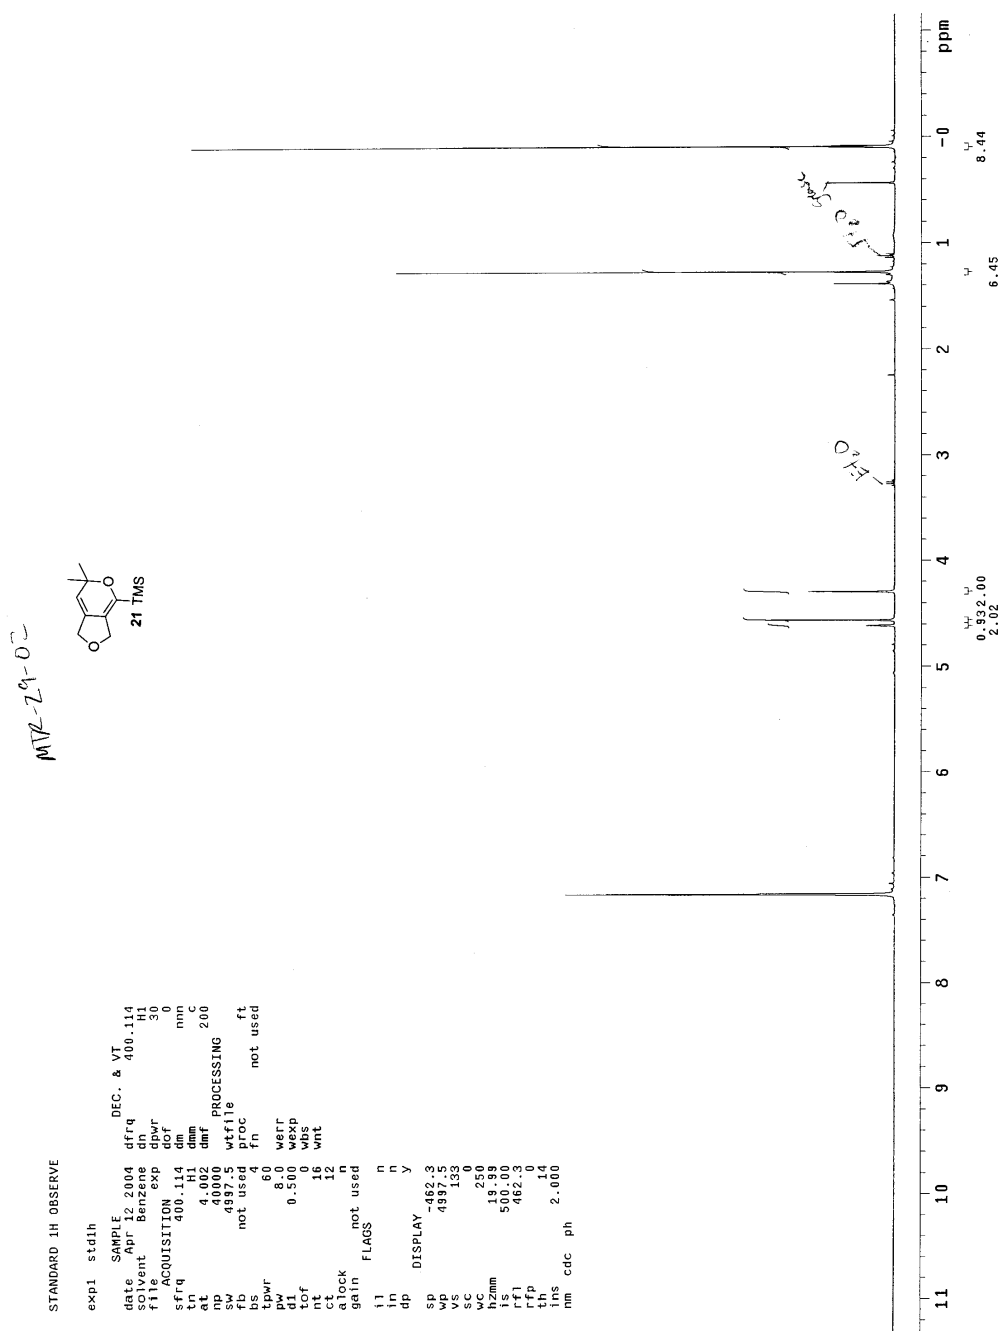



AT12-20-12

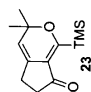

## STANDARD 1H OBSERVE

```

expl stdh
SAMPLE
date Apr 24 2004 dfreq DEC. & VT 400.114
solvent Benzene d1 H1
file ACQUISITION exp dpwr 30
sfreq 400.114 dm 0
tn 400.114 dnm nm
at 4.002 dmf 200
np 400000 utfile c
sw 432000 not used
fb not used proc ft
bs 4 fn not used
tpwr 60
pw 80 werr
t1 0.500 wbp
nt 16 wnt
ct 8
alock not used
gain FLAGS n
il n
in n
dp DISPLAY y
sp -462.2
wp 4997.5
vs 147
wc 250
hzmm 19.99
is 367.64
rfi 2864.8
rtp 11
th 11
ins cdc ph
nm 1.000
  
```

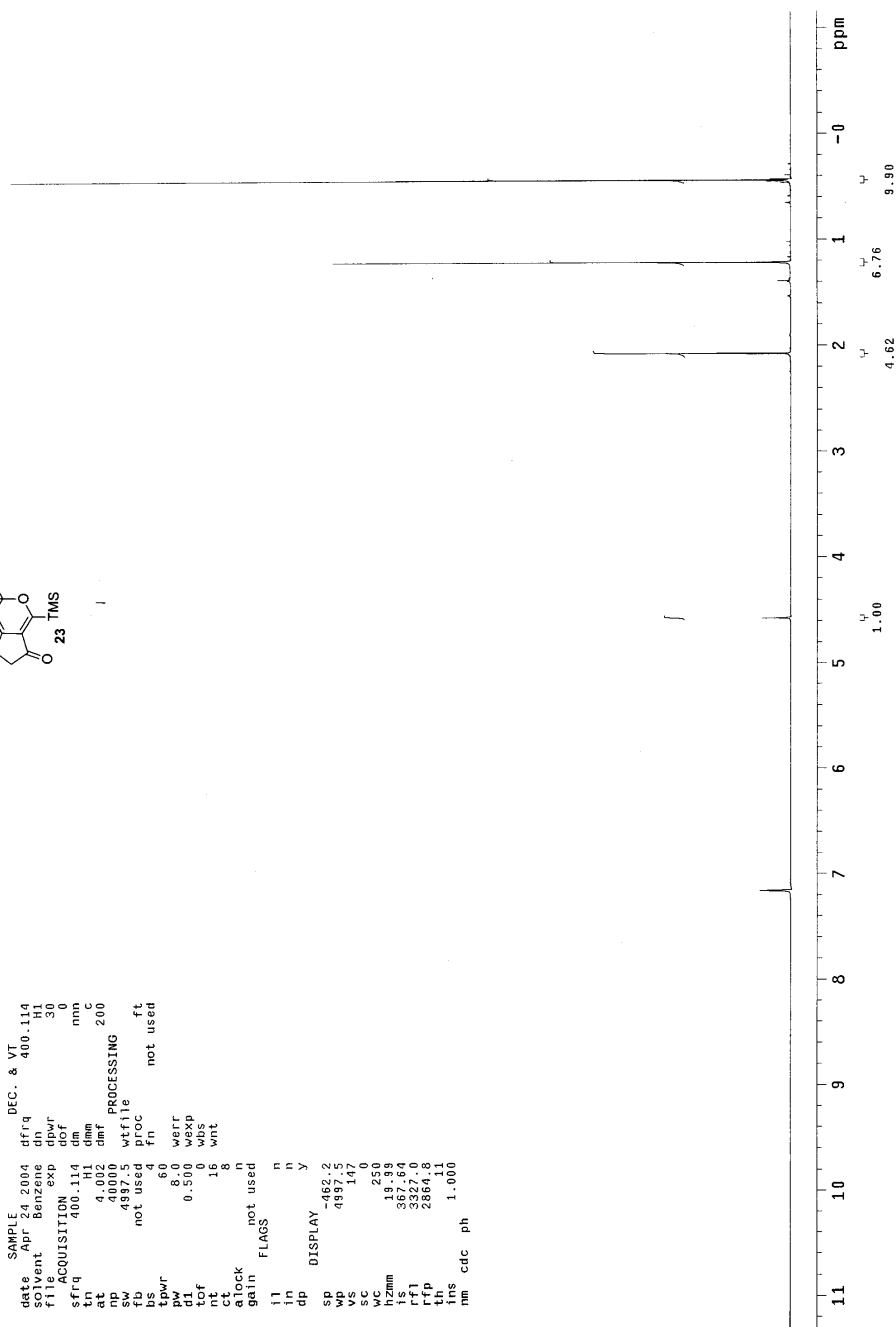

# Supporting Materials

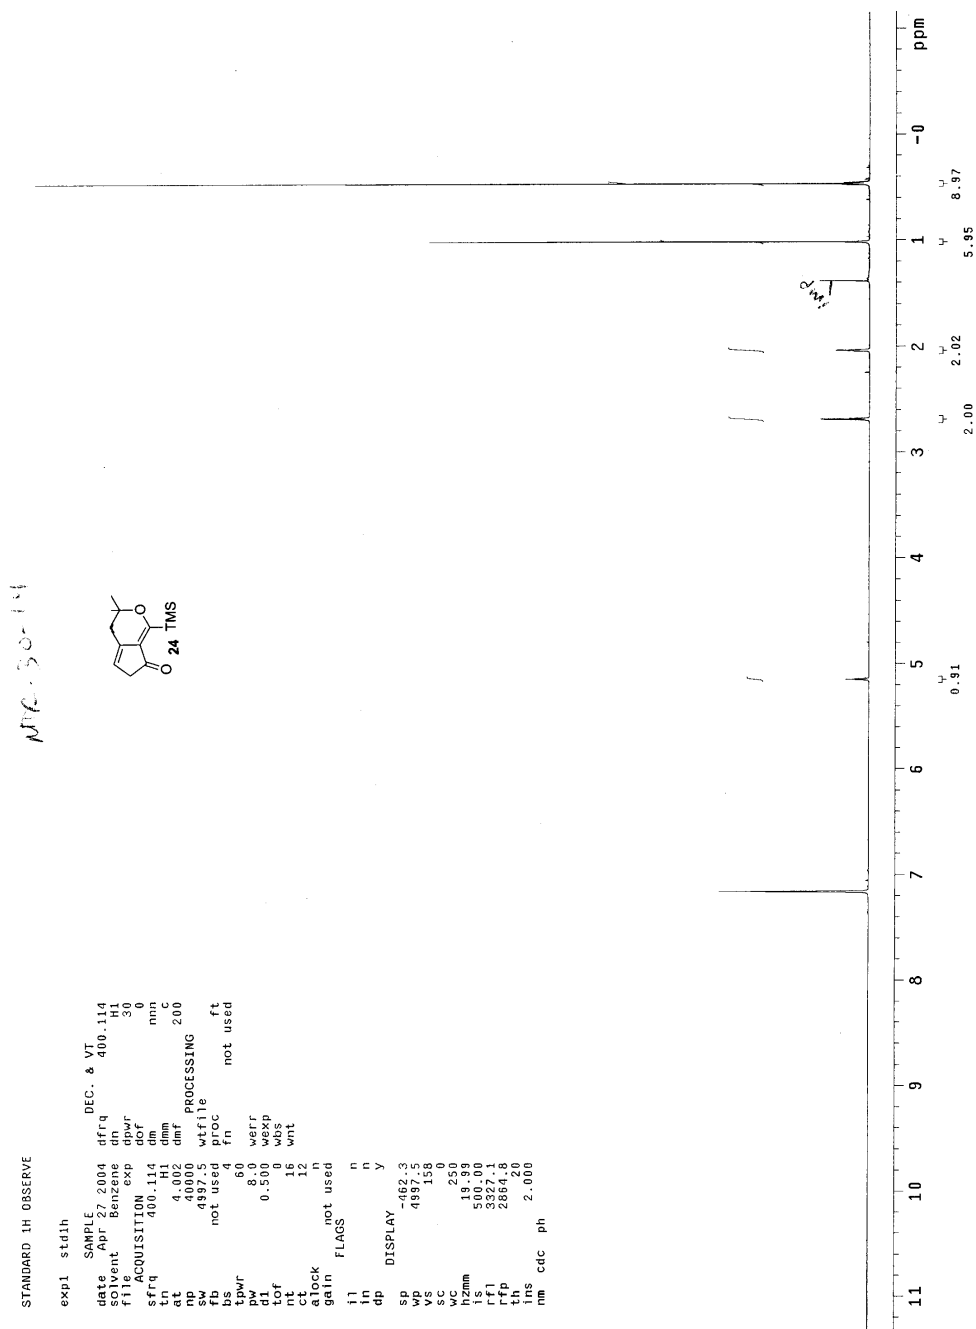

33606m

STANDARD 1H OBSERVE

```

expl stdlh
SAMPLE 8 2004 DEC. & VT
date May Benzene dfrq 400.114
solvent file exp dn 30
ACQUISITION 400.114 0
dfrq 400.114 0
at 4.002 dmf 200
np 40000 wfile
sw 4937.5 wproc ft
bs not used 9 fn not used
tpwr 60
pw 8.0 werr
td 0.500 wexp
ct 16 wnt
nt 8
ct 8
alock n
gain not used
il n
in n
dp n
DISPLAY y
sp -462.3
wp 4937.5
vs 145
sc 0
h2mm 250
ls 19.99
rfl 334.36
rfi 462.3
tp 0
ins 40
nm cdc ph 2.000

```

MTR-3D-22

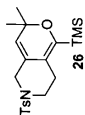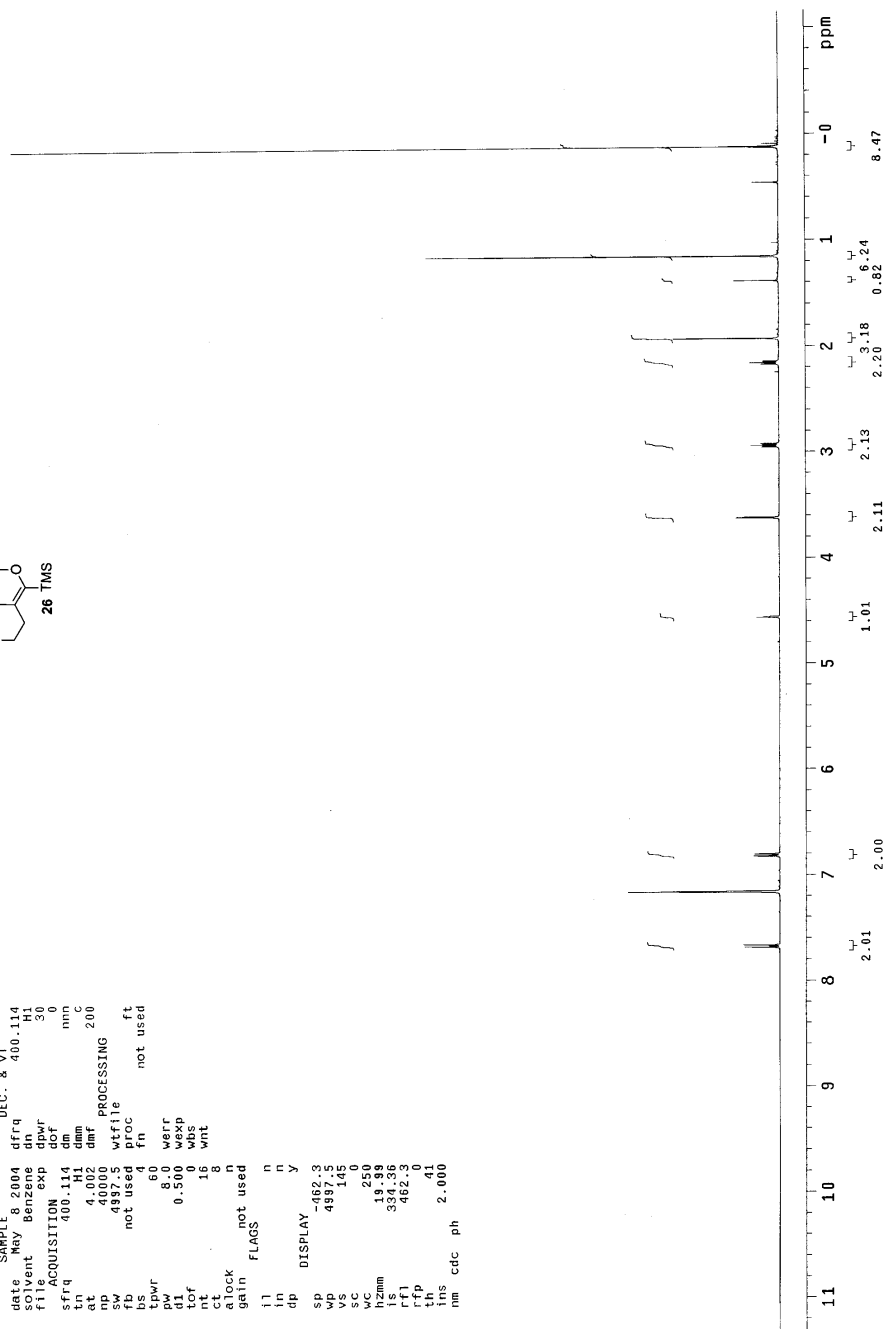

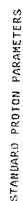

exp1 s2pu1

[illegible]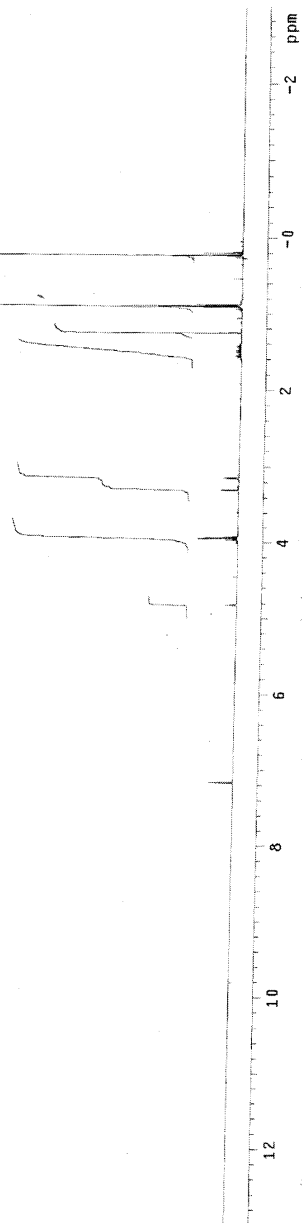

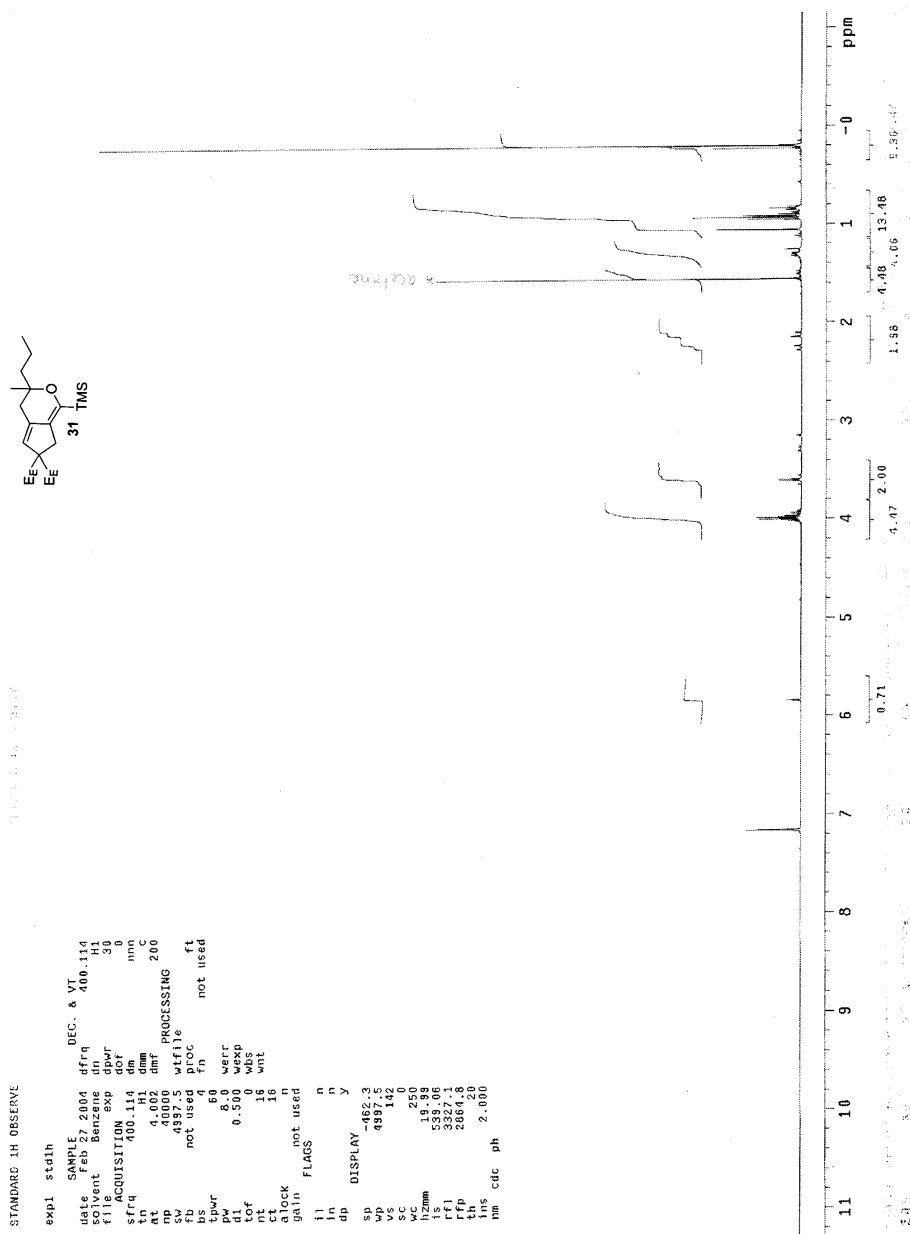

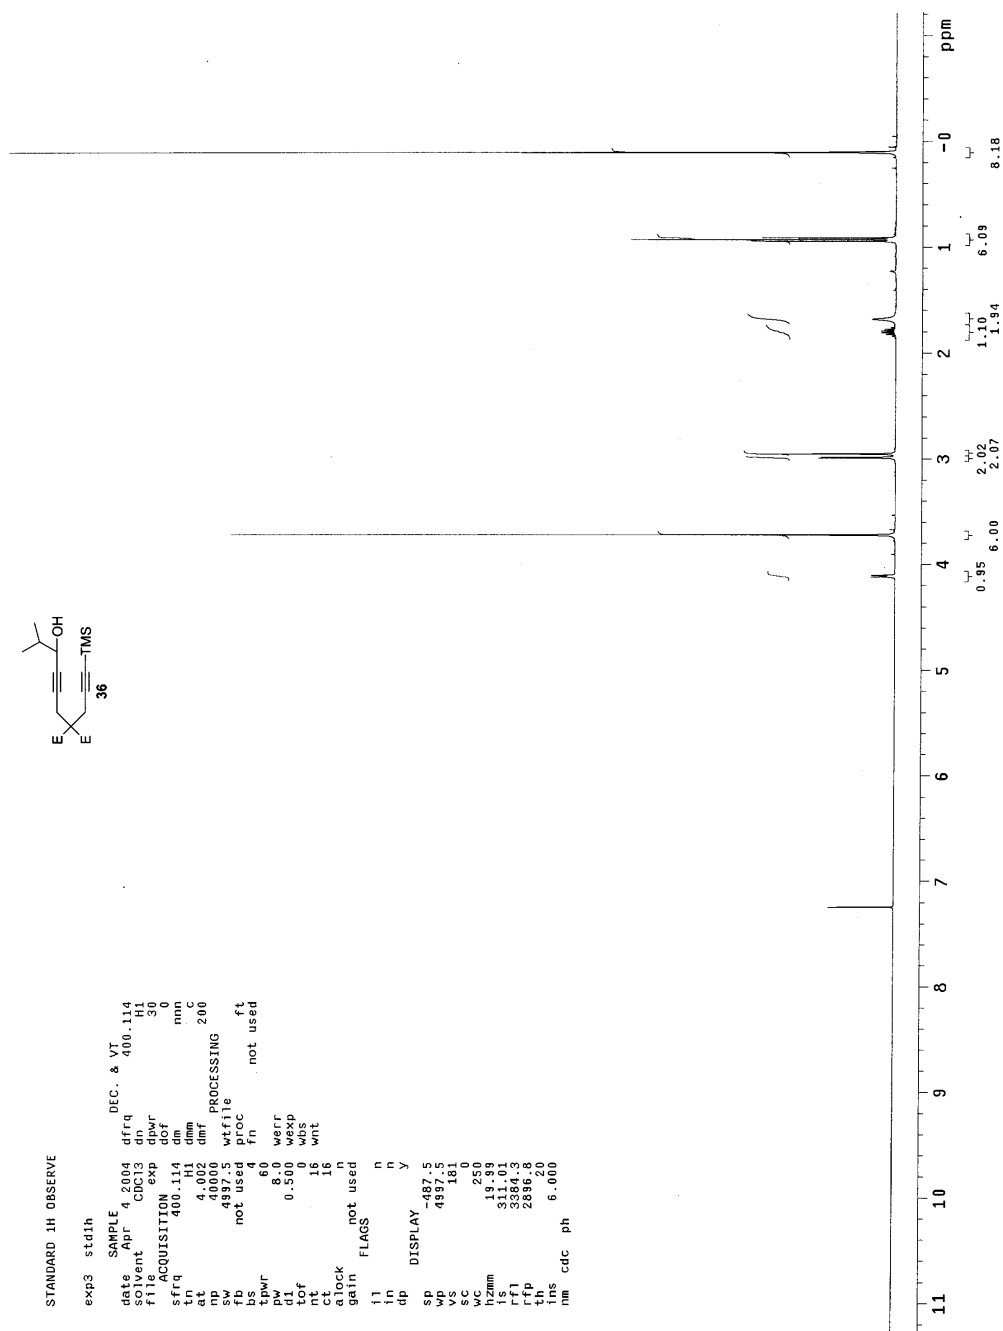

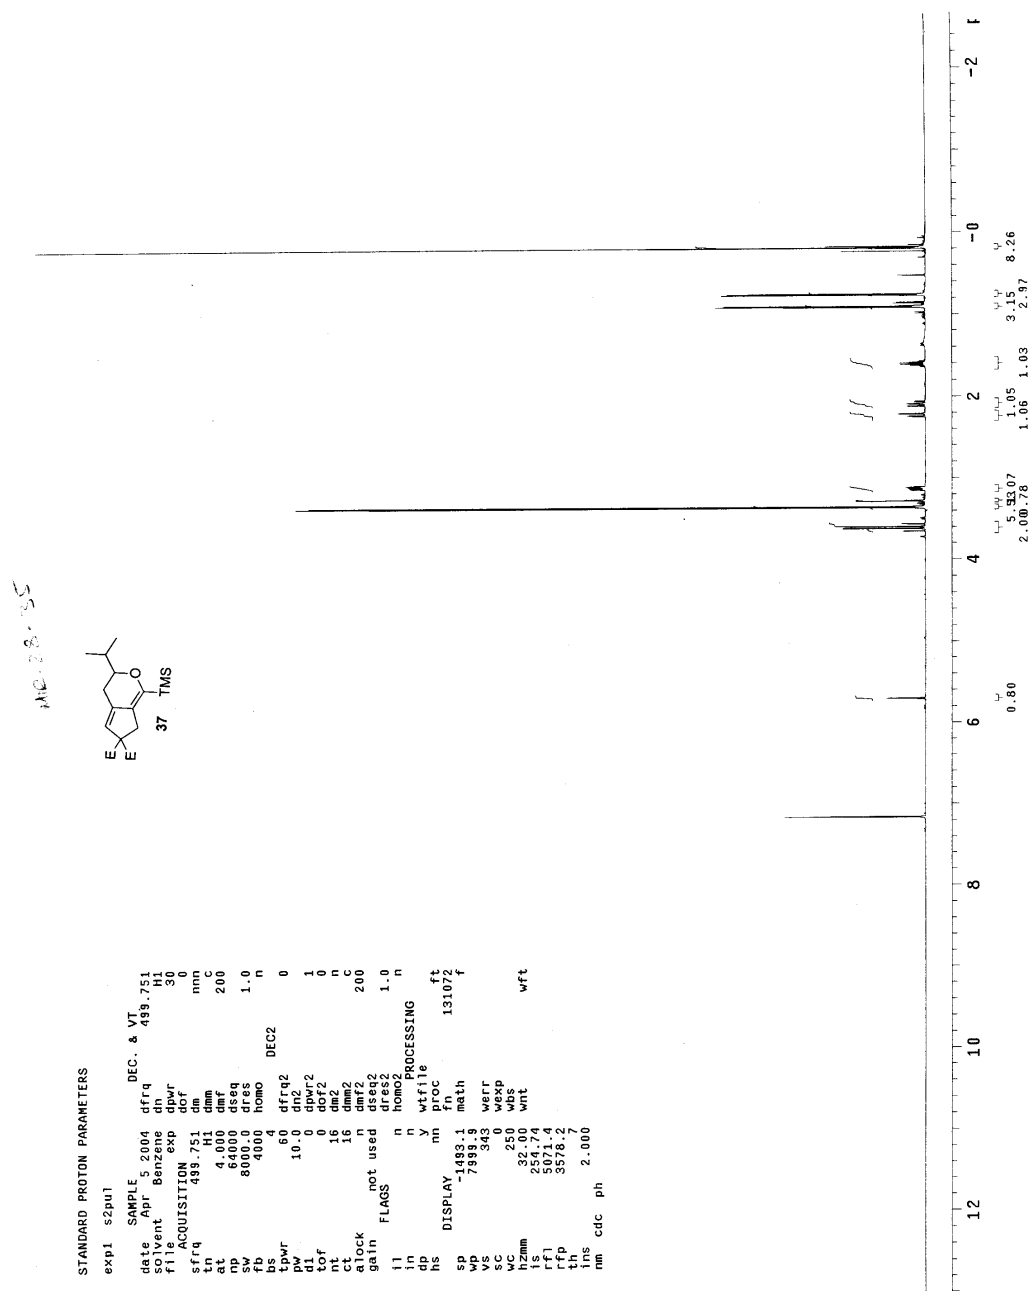

# Supporting Materials

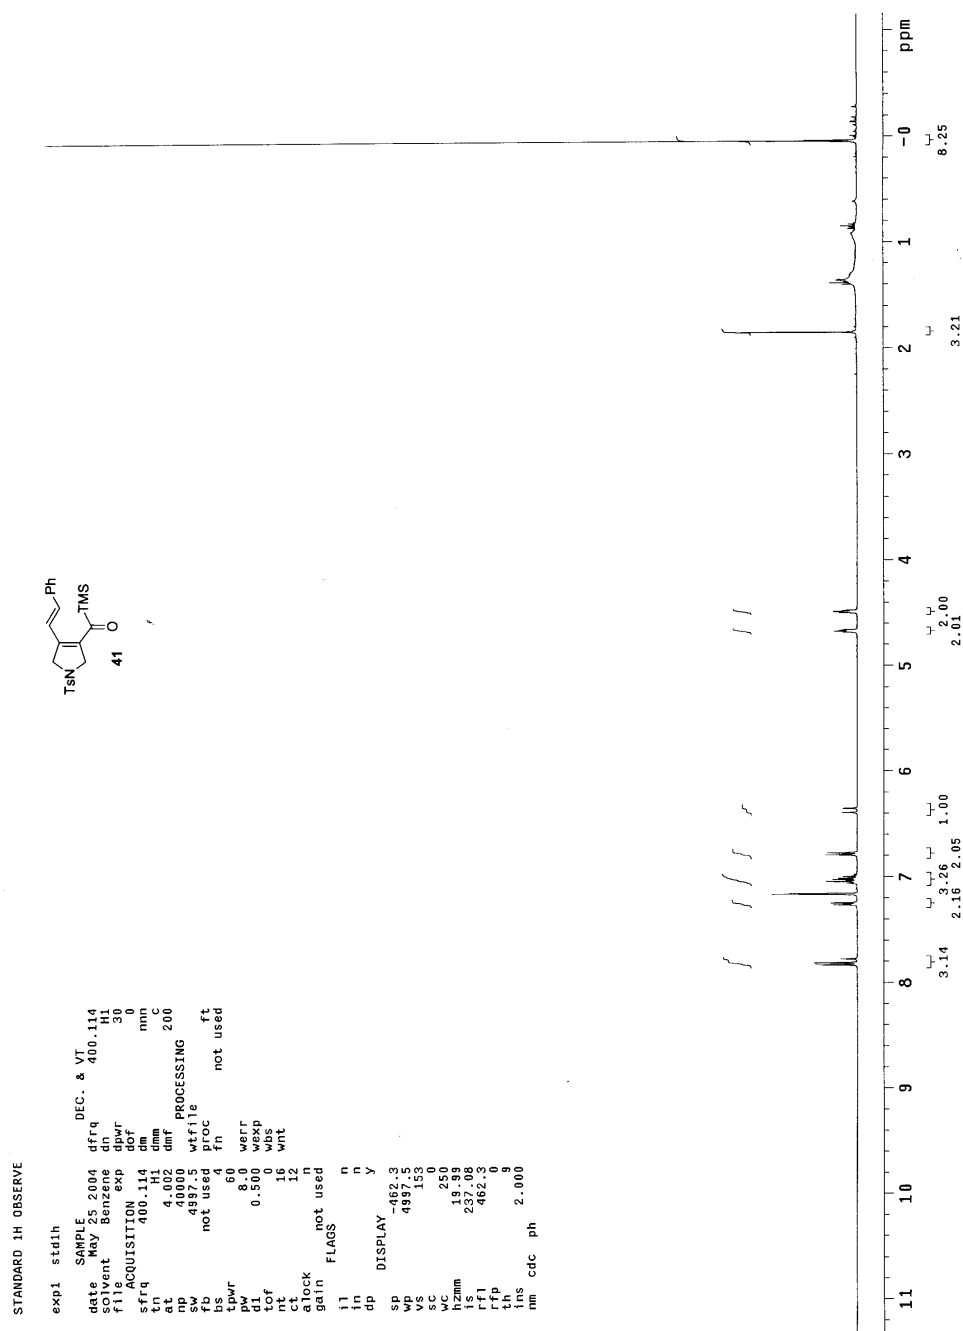



## Supporting Materials

- [1] Trost, B. M.; Older, C. M. *Organometallics* **2002**, *21*, 2544-2546.
- [2] Trost, B. M.; Rudd, M. T. *J. Am. Chem. Soc.* **2002**, *124*, 4178-4179.
